# Supplementary material for: Identification of long non-coding RNA-mediated transcriptional dysregulation triplets reveals global patterns and prognostic biomarkers for ER+/PR+, HER2− and triple negative breast cancer
Source: PubMed Central journal article supplement — Int J Mol Med. 2019 Jun 27;44(3):1015–25. doi: 10.3892/ijmm.2019.4261 (PMC6657959; doi:10.3892/ijmm.2019.4261), 2019-06-27
Supplement: Supplementary_Data.pdf [file Supplementary_Data.pdf]

Table SI. Triple negative breast cancer long non-coding RNA-mediated transcriptional dysregulation triplet network.

| Number | lncRNA     | TF     | Gene    | Class | Number | lncRNA         | TF     | Gene     | Class |
|--------|------------|--------|---------|-------|--------|----------------|--------|----------|-------|
| 1      | AC010761.8 | NFATC2 | FCER2   | 5     | 710    | LINC01139      | PAX5   | CIITA    | 5     |
| 2      | AC010761.8 | STAT6  | FCER2   | 4     | 711    | LINC01139      | CEBPB  | DDIT4    | 6     |
| 3      | AC010761.8 | POU2F2 | HLA-DRA | 4     | 712    | LINC01139      | PAX5   | AICDA    | 3     |
| 4      | AC010761.8 | IRF7   | IL12A   | 6     | 713    | LEF1-AS1       | SPI1   | CD68     | 5     |
| 5      | AC010761.8 | IRF1   | CXCL10  | 6     | 714    | PCAT1          | STAT1  | TYMP     | 4     |
| 6      | AC010761.8 | IRF4   | CIITA   | 5     | 715    | PCAT1          | POU2F2 | HLA-DRA  | 5     |
| 7      | AC010761.8 | PAX5   | CIITA   | 4     | 716    | PCAT1          | RUNX2  | IBSP     | 3     |
| 8      | AC024560.2 | STAT1  | IL12A   | 5     | 717    | PCAT1          | IRF1   | IL10     | 5     |
| 9      | AC024560.2 | FOXA2  | PDX1    | 4     | 718    | PCAT1          | STAT2  | IL12A    | 4     |
| 10     | AC024560.2 | STAT1  | IL21    | 5     | 719    | PCAT1          | FOXD1  | SERPINE1 | 3     |
| 11     | AC024560.2 | STAT2  | IL21    | 5     | 720    | PCAT1          | SPI1   | PTGIR    | 6     |
| 12     | AC093818.1 | PAX5   | CD19    | 5     | 721    | RP11-169D4.2.1 | POU2F1 | GNRHR    | 3     |
| 13     | AC093818.1 | PAX5   | FCER2   | 5     | 722    | RP11-169D4.2.1 | NKX2-5 | PLOD1    | 4     |
| 14     | AC093818.1 | FOSL1  | PLAU    | 4     | 723    | RP11-169D4.2.1 | E2F1   | POLE2    | 6     |
| 15     | AC093818.1 | CEBPB  | SLC11A1 | 6     | 724    | RP11-445K13.2  | NFATC2 | CD3G     | 5     |
| 16     | AC093818.1 | E2F1   | TERT    | 3     | 725    | RP11-445K13.2  | NFATC2 | CTLA4    | 5     |
| 17     | AC093818.1 | PAX5   | AICDA   | 5     | 726    | RP11-445K13.2  | PAX5   | FCER2    | 5     |
| 18     | AC104699.1 | STAT6  | FCER2   | 4     | 727    | RP11-445K13.2  | CEBPB  | HP       | 3     |
| 19     | AC104699.1 | AR     | KLK4    | 4     | 728    | RP11-445K13.2  | IRF1   | IL10     | 5     |
| 20     | AC156455.1 | CEBPZ  | COL1A1  | 2     | 729    | RP11-445K13.2  | STAT1  | IL12A    | 5     |
| 21     | AC156455.1 | STAT6  | FCER2   | 4     | 730    | RP11-445K13.2  | SPI1   | PTGIR    | 6     |
| 22     | AC156455.1 | E2F1   | HELLS   | 6     | 731    | RP11-445K13.2  | E2F4   | AURKB    | 6     |
| 23     | AC156455.1 | IRF7   | IFNB1   | 3     | 732    | RP11-445K13.2  | PAX5   | AICDA    | 5     |
| 24     | AC156455.1 | IRF7   | IL12A   | 3     | 733    | AC010761.8.1   | NFATC2 | FCER2    | 5     |
| 25     | AC156455.1 | POU2F1 | PTGIR   | 3     | 734    | AC010761.8.1   | STAT6  | FCER2    | 4     |
| 26     | AC156455.1 | IRF5   | ISG15   | 5     | 735    | AC010761.8.1   | POU2F2 | HLA-DRA  | 4     |
| 27     | AFAP1-AS1  | E2F1   | HELLS   | 6     | 736    | AC010761.8.1   | IRF7   | IL12A    | 6     |
| 28     | AFAP1-AS1  | IRF1   | IFIT2   | 5     | 737    | AC010761.8.1   | IRF1   | CXCL10   | 6     |
| 29     | AFAP1-AS1  | IRF7   | IFNB1   | 5     | 738    | AC010761.8.1   | IRF4   | CIITA    | 5     |
| 30     | AFAP1-AS1  | IRF1   | CXCL10  | 5     | 739    | AC010761.8.1   | PAX5   | CIITA    | 4     |
| 31     | AFAP1-AS1  | PAX5   | CIITA   | 3     | 740    | RP11-496H1.2   | JUN    | ATF3     | 6     |
| 32     | AFAP1-AS1  | FOSL1  | PLAU    | 3     | 741    | RP11-496H1.2   | NFATC2 | CD3G     | 5     |
| 33     | AFAP1-AS1  | IRF1   | IFITM1  | 5     | 742    | RP11-496H1.2   | NFATC2 | CD40LG   | 5     |
| 34     | AFAP1-AS1  | IRF7   | ISG15   | 5     | 743    | RP11-496H1.2   | E2F1   | CDKN2A   | 3     |
| 35     | AFAP1-AS1  | E2F1   | NUSAP1  | 6     | 744    | RP11-496H1.2   | NFATC2 | CTLA4    | 5     |
| 36     | AFAP1-AS1  | CDX2   | UGT1A8  | 3     | 745    | RP11-496H1.2   | CEBPB  | HP       | 4     |
| 37     | AP001439.2 | IRF8   | CYBB    | 5     | 746    | RP11-496H1.2   | IRF7   | IL12A    | 3     |
| 38     | AP001439.2 | SPI1   | CYBB    | 5     | 747    | RP11-496H1.2   | NFATC2 | IRF4     | 5     |
| 39     | AP001439.2 | USF1   | CYP19A1 | 3     | 748    | RP11-496H1.2   | SPI1   | PTGIR    | 5     |
| 40     | AP001439.2 | SPI1   | NCF2    | 5     | 749    | RP11-496H1.2   | IRF9   | CCL19    | 5     |
| 41     | AP001439.2 | E2F1   | NUSAP1  | 6     | 750    | RP11-496H1.2   | CEBPB  | SLC11A1  | 6     |
| 42     | BDNF-AS    | E2F1   | CDKN2A  | 5     | 751    | AC156455.1.1   | CEBPZ  | COL1A1   | 2     |
| 43     | BDNF-AS    | USF1   | CYP19A1 | 3     | 752    | AC156455.1.1   | STAT6  | FCER2    | 4     |
| 44     | BDNF-AS    | STAT1  | TYMP    | 5     | 753    | AC156455.1.1   | E2F1   | HELLS    | 6     |
| 45     | BDNF-AS    | JUN    | HMMR    | 2     | 754    | AC156455.1.1   | IRF7   | IFNB1    | 3     |
| 46     | BDNF-AS    | CEBPB  | HP      | 3     | 755    | AC156455.1.1   | IRF7   | IL12A    | 3     |
| 47     | BDNF-AS    | SPI1   | NCF2    | 5     | 756    | AC156455.1.1   | POU2F1 | PTGIR    | 3     |
| 48     | BDNF-AS    | AR     | KLK4    | 3     | 757    | AC156455.1.1   | IRF5   | ISG15    | 5     |
| 49     | BDNF-AS    | IRF1   | ISG15   | 5     | 758    | AFAP1-AS1.1    | E2F1   | HELLS    | 6     |
| 50     | BDNF-AS    | IRF1   | FOXP3   | 6     | 759    | AFAP1-AS1.1    | IRF1   | IFIT2    | 5     |
| 51     | BLACAT1    | IRF4   | B2M     | 6     | 760    | AFAP1-AS1.1    | IRF7   | IFNB1    | 5     |
| 52     | BLACAT1    | IRF8   | B2M     | 6     | 761    | AFAP1-AS1.1    | IRF1   | CXCL10   | 5     |
| 53     | BLACAT1    | NFATC2 | CD3G    | 6     | 762    | AFAP1-AS1.1    | PAX5   | CIITA    | 3     |
| 54     | BLACAT1    | NFATC2 | CTLA4   | 6     | 763    | AFAP1-AS1.1    | FOSL1  | PLAU     | 3     |
| 55     | BLACAT1    | STAT1  | CYBB    | 6     | 764    | AFAP1-AS1.1    | IRF1   | IFITM1   | 5     |
| 56     | BLACAT1    | E2F1   | HELLS   | 3     | 765    | AFAP1-AS1.1    | IRF7   | ISG15    | 5     |
| 57     | BLACAT1    | IRF1   | IFIT2   | 3     | 766    | AFAP1-AS1.1    | E2F1   | NUSAP1   | 6     |
| 58     | BLACAT1    | IRF1   | IDO1    | 6     | 767    | AFAP1-AS1.1    | CDX2   | UGT1A8   | 3     |
| 59     | BLACAT1    | IRF1   | IRF7    | 6     | 768    | MIR4435-2HG.1  | FOSL1  | PLAU     | 4     |

Table SI. Continued.

| Number | lncRNA      | TF    | Gene    | Class | Number | lncRNA       | TF     | Gene     | Class |
|--------|-------------|-------|---------|-------|--------|--------------|--------|----------|-------|
| 60     | BLACAT1     | IRF7  | CCL5    | 3     | 769    | LBX2-AS1     | CDX2   | CA1      | 4     |
| 61     | BLACAT1     | IRF9  | CCL19   | 6     | 770    | LBX2-AS1     | E2F1   | CDKN2A   | 6     |
| 62     | BLACAT1     | IRF1  | ISG15   | 6     | 771    | LBX2-AS1     | STAT1  | TYMP     | 3     |
| 63     | C5orf66-AS1 | STAT1 | TYMP    | 6     | 772    | LBX2-AS1     | IRF1   | IFIT2    | 6     |
| 64     | C5orf66-AS1 | IRF1  | IFIT2   | 3     | 773    | LBX2-AS1     | IRF1   | IFNB1    | 3     |
| 65     | C5orf66-AS1 | IRF1  | IFNB1   | 6     | 774    | LBX2-AS1     | IRF1   | IRF7     | 6     |
| 66     | C5orf66-AS1 | VAV1  | ITGAM   | 6     | 775    | LBX2-AS1     | CEBPB  | MEFV     | 3     |
| 67     | C5orf66-AS1 | ETV7  | LYN     | 6     | 776    | LBX2-AS1     | FOXD1  | SERPINE1 | 3     |
| 68     | C5orf66-AS1 | E2F1  | AURKB   | 6     | 777    | LBX2-AS1     | FOSL1  | PLAUR    | 6     |
| 69     | C5orf66-AS1 | IRF1  | ISG15   | 6     | 778    | LBX2-AS1     | IRF1   | ISG15    | 6     |
| 70     | CASC11      | IRF4  | B2M     | 6     | 779    | LBX2-AS1     | IRF7   | ISG15    | 6     |
| 71     | CASC11      | FOSL1 | PLAUR   | 6     | 780    | LBX2-AS1     | SPI1   | ISG15    | 6     |
| 72     | CASC11      | IRF9  | CCL19   | 3     | 781    | LBX2-AS1     | SPI1   | GPR132   | 6     |
| 73     | CASC11      | CEBPB | SLC11A1 | 6     | 782    | RASSF1-AS1   | STAT6  | FCER2    | 4     |
| 74     | CASC11      | CEBPB | DDIT4   | 5     | 783    | RASSF1-AS1   | STAT1  | IL12A    | 5     |
| 75     | CASC8       | STAT6 | FCER2   | 6     | 784    | RASSF1-AS1   | PAX5   | CIITA    | 5     |
| 76     | CASC8       | IRF1  | IFNB1   | 3     | 785    | RASSF1-AS1   | E2F4   | AURKB    | 6     |
| 77     | CASC8       | FOXA2 | PDX1    | 3     | 786    | RASSF1-AS1   | CEBPB  | DDIT4    | 6     |
| 78     | CASC8       | ETV7  | LYN     | 6     | 787    | CDKN2B-AS1.1 | PAX5   | FCER2    | 6     |
| 79     | CASC8       | IRF4  | CIITA   | 6     | 788    | CDKN2B-AS1.1 | NKX2-5 | PLOD1    | 3     |
| 80     | CASC8       | SPI1  | PTGIR   | 3     | 789    | CDKN2B-AS1.1 | IRF9   | CCL19    | 6     |
| 81     | CASC8       | IRF9  | CCL19   | 3     | 790    | CDKN2B-AS1.1 | IRF1   | IFITM1   | 6     |
| 82     | CASC8       | CEBPB | SLC11A1 | 3     | 791    | CDKN2B-AS1.1 | PAX5   | AICDA    | 3     |
| 83     | CASC8       | STAT2 | IL21    | 6     | 792    | HAR1B        | E2F1   | CDKN2A   | 4     |
| 84     | DDX11-AS1   | JUN   | ATF3    | 6     | 793    | HAR1B        | STAT1  | IL2RA    | 5     |
| 85     | DDX11-AS1   | IRF1  | IFNB1   | 6     | 794    | HAR1B        | STAT1  | IDO1     | 5     |
| 86     | DDX11-AS1   | IRF1  | IL12A   | 6     | 795    | HAR1B        | FOSL1  | PLAU     | 4     |
| 87     | DDX11-AS1   | STAT1 | IL12A   | 6     | 796    | HAR1B        | NKX2-5 | PLOD1    | 4     |
| 88     | DDX11-AS1   | IRF1  | IRF7    | 6     | 797    | HAR1B        | STAT1  | PRF1     | 5     |
| 89     | DDX11-AS1   | IRF7  | CCL5    | 6     | 798    | HAR1B        | IRF7   | CCL5     | 5     |
| 90     | DDX11-AS1   | IRF9  | CCL19   | 3     | 799    | HAR1B        | STAT1  | SOAT1    | 5     |
| 91     | DDX11-AS1   | IRF1  | IFITM1  | 6     | 800    | DEPDC1-AS1   | STAT1  | TYMP     | 6     |
| 92     | DDX11-AS1   | IRF1  | ISG15   | 6     | 801    | DEPDC1-AS1   | IRF7   | IFNB1    | 6     |
| 93     | DDX11-AS1   | SPI1  | ISG15   | 6     | 802    | DEPDC1-AS1   | IRF1   | IRF7     | 6     |
| 94     | DDX11-AS1   | PAX5  | AICDA   | 6     | 803    | DEPDC1-AS1   | PAX5   | CIITA    | 6     |
| 95     | DGCR9       | STAT1 | CD86    | 5     | 804    | DEPDC1-AS1   | STAT1  | PSMB9    | 6     |
| 96     | DGCR9       | STAT1 | CYBB    | 5     | 805    | DEPDC1-AS1   | IRF7   | CCL5     | 6     |
| 97     | DGCR9       | STAT1 | FCGR1A  | 5     | 806    | DEPDC1-AS1   | IRF9   | CCL19    | 6     |
| 98     | DGCR9       | JUN   | HMMR    | 1     | 807    | DEPDC1-AS1   | CEBPB  | SLC11A1  | 3     |
| 99     | DGCR9       | IRF1  | IL12B   | 6     | 808    | DEPDC1-AS1   | STAT2  | IL21     | 3     |
| 100    | DGCR9       | STAT1 | PRF1    | 5     | 809    | LINC02158    | STAT6  | FCER2    | 4     |
| 101    | DGCR9       | E2F1  | AURKB   | 6     | 810    | LINC02158    | STAT2  | IL12A    | 4     |
| 102    | DGCR9       | SPI1  | GPR132  | 5     | 811    | LINC01293    | JUN    | ATF3     | 6     |
| 103    | DLEU2       | FUBP1 | BRCA1   | 6     | 812    | LINC01293    | E2F1   | CDC25A   | 3     |
| 104    | DLEU2       | PAX5  | CD19    | 6     | 813    | LINC01293    | E2F1   | HELLS    | 3     |
| 105    | DLEU2       | PAX5  | FCER2   | 6     | 814    | LINC01293    | POU2F2 | HLA-DRA  | 5     |
| 106    | DLEU2       | JUN   | HMMR    | 1     | 815    | LINC01293    | JUN    | HMMR     | 1     |
| 107    | DLEU2       | IRF7  | IFNB1   | 6     | 816    | LINC01293    | NKX2-5 | PLOD1    | 3     |
| 108    | DLEU2       | IRF1  | IL12A   | 3     | 817    | LINC01293    | E2F4   | AURKB    | 5     |
| 109    | DLEU2       | IRF7  | IL12A   | 3     | 818    | LINC01293    | PAX5   | AICDA    | 6     |
| 110    | DLEU2       | CEBPB | SLC11A1 | 6     | 819    | LINC01671    | SPI1   | CYBB     | 5     |
| 111    | DLEU2       | IRF7  | ISG15   | 6     | 820    | LINC01671    | IRF7   | IFNB1    | 4     |
| 112    | DLEU2       | IRF1  | FOXP3   | 5     | 821    | LINC01671    | IRF1   | IL10     | 5     |
| 113    | DLX6-AS1    | SPI1  | CD68    | 5     | 822    | LINC01671    | IRF1   | IL12A    | 4     |
| 114    | DLX6-AS1    | IRF1  | CYBB    | 5     | 823    | LINC01671    | IRF7   | IL12A    | 4     |
| 115    | DLX6-AS1    | STAT1 | CYBB    | 5     | 824    | LINC01671    | IRF1   | IL12B    | 6     |
| 116    | DLX6-AS1    | USF1  | CYP19A1 | 6     | 825    | LINC01671    | SPI1   | PTGIR    | 6     |
| 117    | DLX6-AS1    | CEBPB | HP      | 3     | 826    | BDNF-AS.1    | E2F1   | CDKN2A   | 5     |
| 118    | DLX6-AS1    | STAT1 | IDO1    | 5     | 827    | BDNF-AS.1    | USF1   | CYP19A1  | 3     |

Table SI. Continued.

| Number | lncRNA    | TF     | Gene     | Class | Number | lncRNA        | TF     | Gene    | Class |
|--------|-----------|--------|----------|-------|--------|---------------|--------|---------|-------|
| 119    | DLX6-AS1  | SPIB   | ITGAM    | 5     | 828    | BDNF-AS.1     | STAT1  | TYMP    | 5     |
| 120    | DLX6-AS1  | STAT1  | MSR1     | 4     | 829    | BDNF-AS.1     | JUN    | HMMR    | 2     |
| 121    | DLX6-AS1  | STAT1  | PRF1     | 5     | 830    | BDNF-AS.1     | CEBPB  | HP      | 3     |
| 122    | DLX6-AS1  | SPI1   | ISG15    | 4     | 831    | BDNF-AS.1     | SPI1   | NCF2    | 5     |
| 123    | DLX6-AS1  | IRF1   | XAF1     | 5     | 832    | BDNF-AS.1     | AR     | KLK4    | 3     |
| 124    | DUXAP8    | STAT1  | TYMP     | 4     | 833    | BDNF-AS.1     | IRF1   | ISG15   | 5     |
| 125    | DUXAP8    | STAT1  | FCGR1A   | 5     | 834    | BDNF-AS.1     | IRF1   | FOXP3   | 6     |
| 126    | DUXAP8    | CEBPB  | HP       | 3     | 835    | BLACAT1.1     | IRF4   | B2M     | 6     |
| 127    | DUXAP8    | IRF7   | IFNB1    | 5     | 836    | BLACAT1.1     | IRF8   | B2M     | 6     |
| 128    | DUXAP8    | IRF1   | IRF7     | 5     | 837    | BLACAT1.1     | NFATC2 | CD3G    | 6     |
| 129    | DUXAP8    | SPI1   | NCF2     | 5     | 838    | BLACAT1.1     | NFATC2 | CTLA4   | 6     |
| 130    | DUXAP8    | STAT1  | PSMB9    | 5     | 839    | BLACAT1.1     | STAT1  | CYBB    | 6     |
| 131    | DUXAP8    | IRF7   | CCL5     | 5     | 840    | BLACAT1.1     | E2F1   | HELLS   | 3     |
| 132    | DUXAP8    | IRF1   | ISG15    | 5     | 841    | BLACAT1.1     | IRF1   | IFIT2   | 3     |
| 133    | DUXAP8    | IRF7   | ISG15    | 5     | 842    | BLACAT1.1     | IRF1   | IDO1    | 6     |
| 134    | DUXAP8    | SPI1   | NCF1     | 5     | 843    | BLACAT1.1     | IRF1   | IRF7    | 6     |
| 135    | FLJ22447  | STAT1  | TYMP     | 6     | 844    | BLACAT1.1     | IRF7   | CCL5    | 3     |
| 136    | FLJ22447  | SPI1   | FCGR1B   | 6     | 845    | BLACAT1.1     | IRF9   | CCL19   | 6     |
| 137    | FLJ22447  | CEBPB  | HP       | 4     | 846    | BLACAT1.1     | IRF1   | ISG15   | 6     |
| 138    | FLJ22447  | RUNX2  | IBSP     | 4     | 847    | BLACAT1.2     | IRF4   | B2M     | 6     |
| 139    | FLJ22447  | STAT1  | IRF1     | 6     | 848    | BLACAT1.2     | IRF8   | B2M     | 6     |
| 140    | FLJ22447  | E2F1   | POLE2    | 6     | 849    | BLACAT1.2     | NFATC2 | CD3G    | 6     |
| 141    | FLJ22447  | IRF1   | STAT1    | 6     | 850    | BLACAT1.2     | NFATC2 | CTLA4   | 6     |
| 142    | FLJ22447  | IRF1   | IFITM1   | 6     | 851    | BLACAT1.2     | STAT1  | CYBB    | 6     |
| 143    | FLJ22447  | SPI1   | ISG15    | 6     | 852    | BLACAT1.2     | E2F1   | HELLS   | 3     |
| 144    | FLJ22447  | IRF1   | XAF1     | 6     | 853    | BLACAT1.2     | IRF1   | IFIT2   | 3     |
| 145    | FOXCUT    | E2F1   | CDKN2A   | 3     | 854    | BLACAT1.2     | IRF1   | IDO1    | 6     |
| 146    | FOXCUT    | SPI1   | ITGAM    | 6     | 855    | BLACAT1.2     | IRF1   | IRF7    | 6     |
| 147    | FOXCUT    | FOSL1  | MMP1     | 3     | 856    | BLACAT1.2     | IRF7   | CCL5    | 3     |
| 148    | FOXCUT    | FOXD1  | SERPINE1 | 3     | 857    | BLACAT1.2     | IRF9   | CCL19   | 6     |
| 149    | FOXCUT    | IRF7   | ISG15    | 5     | 858    | BLACAT1.2     | IRF1   | ISG15   | 6     |
| 150    | FOXD2-AS1 | SPI1   | CYBB     | 6     | 859    | GATA6-AS1     | STAT6  | FCER2   | 4     |
| 151    | FOXD2-AS1 | RUNX2  | IBSP     | 4     | 860    | GATA6-AS1     | IRF1   | ISG15   | 6     |
| 152    | FOXD2-AS1 | STAT1  | IL12A    | 6     | 861    | C5orf66-AS1.1 | STAT1  | TYMP    | 6     |
| 153    | FOXD2-AS1 | RUNX2  | MMP13    | 5     | 862    | C5orf66-AS1.1 | IRF1   | IFIT2   | 3     |
| 154    | FOXD2-AS1 | CEBPB  | PI3      | 4     | 863    | C5orf66-AS1.1 | IRF1   | IFNB1   | 6     |
| 155    | FOXD2-AS1 | FOSL1  | PLAUR    | 6     | 864    | C5orf66-AS1.1 | VAV1   | ITGAM   | 6     |
| 156    | FOXD2-AS1 | IKZF1  | IKZF3    | 5     | 865    | C5orf66-AS1.1 | ETV7   | LYN     | 6     |
| 157    | FOXD3-AS1 | IRF7   | CCL5     | 6     | 866    | C5orf66-AS1.1 | E2F1   | AURKB   | 6     |
| 158    | FOXD3-AS1 | STAT1  | SOAT1    | 3     | 867    | C5orf66-AS1.1 | IRF1   | ISG15   | 6     |
| 159    | FOXD3-AS1 | E2F4   | AURKB    | 6     | 868    | CASC11.1      | IRF4   | B2M     | 6     |
| 160    | GAPLINC   | RELB   | B2M      | 6     | 869    | CASC11.1      | FOSL1  | PLAUR   | 6     |
| 161    | GAPLINC   | FUBP1  | BRCA1    | 6     | 870    | CASC11.1      | IRF9   | CCL19   | 3     |
| 162    | GAPLINC   | CDX2   | CA1      | 4     | 871    | CASC11.1      | CEBPB  | SLC11A1 | 6     |
| 163    | GAPLINC   | STAT1  | TYMP     | 3     | 872    | CASC11.1      | CEBPB  | DDIT4   | 5     |
| 164    | GAPLINC   | FOSL1  | PLAUR    | 6     | 873    | DLX6-AS1.1    | SPI1   | CD68    | 5     |
| 165    | GHRLOS    | PAX5   | CD19     | 5     | 874    | DLX6-AS1.1    | IRF1   | CYBB    | 5     |
| 166    | GHRLOS    | SPI1   | CD68     | 5     | 875    | DLX6-AS1.1    | STAT1  | CYBB    | 5     |
| 167    | GHRLOS    | STAT6  | FCER2    | 4     | 876    | DLX6-AS1.1    | USF1   | CYP19A1 | 6     |
| 168    | GHRLOS    | POU2F1 | GNRHR    | 4     | 877    | DLX6-AS1.1    | CEBPB  | HP      | 3     |
| 169    | GHRLOS    | E2F1   | HELLS    | 6     | 878    | DLX6-AS1.1    | STAT1  | IDO1    | 5     |
| 170    | GHRLOS    | STAT1  | IL12A    | 4     | 879    | DLX6-AS1.1    | SPIB   | ITGAM   | 5     |
| 171    | GHRLOS    | NFATC2 | IRF4     | 5     | 880    | DLX6-AS1.1    | STAT1  | MSR1    | 4     |
| 172    | GHRLOS    | IRF4   | CIITA    | 5     | 881    | DLX6-AS1.1    | STAT1  | PRF1    | 5     |
| 173    | GHRLOS    | PAX5   | CIITA    | 4     | 882    | DLX6-AS1.1    | SPI1   | ISG15   | 4     |
| 174    | GHRLOS    | NKX2-5 | PLOD1    | 4     | 883    | DLX6-AS1.1    | IRF1   | XAF1    | 5     |
| 175    | GHRLOS    | CEBPB  | DDIT4    | 5     | 884    | LINC02086     | CDX2   | CA1     | 4     |
| 176    | HCP5      | PAX5   | CD19     | 4     | 885    | LINC02086     | PAX5   | CIITA   | 6     |
| 177    | HCP5      | PAX5   | FCER2    | 4     | 886    | LINC00565     | JUN    | ATF3    | 6     |

Table S1. Continued.

| Number | lncRNA     | TF     | Gene    | Class | Number | lncRNA       | TF     | Gene    | Class |
|--------|------------|--------|---------|-------|--------|--------------|--------|---------|-------|
| 178    | HCP5       | PAX5   | CIITA   | 4     | 887    | LINC00565    | PAX5   | CD19    | 5     |
| 179    | HCP5       | SPI1   | PTGIR   | 6     | 888    | LINC00565    | SPI1   | CD68    | 5     |
| 180    | HCP5       | SPI1   | ISG15   | 6     | 889    | LINC00565    | SPI1   | CYBB    | 6     |
| 181    | HCP5       | PAX5   | AICDA   | 4     | 890    | LINC00565    | STAT1  | TYMP    | 6     |
| 182    | HIF1A-AS1  | E2F1   | CDC25A  | 6     | 891    | LINC00565    | IKZF1  | GZMB    | 6     |
| 183    | HIF1A-AS1  | E2F1   | CDKN2A  | 6     | 892    | LINC00565    | RUNX2  | IBSP    | 4     |
| 184    | HIF1A-AS1  | JUN    | HMMR    | 1     | 893    | LINC00565    | CEBPB  | MEFV    | 5     |
| 185    | HIF1A-AS1  | FOSL1  | IVL     | 4     | 894    | LINC00565    | STAT1  | CIITA   | 6     |
| 186    | HIF1A-AS1  | E2F1   | POLE2   | 3     | 895    | LINC00565    | RUNX2  | MMP13   | 5     |
| 187    | HIF1A-AS1  | IRF1   | IFITM1  | 6     | 896    | LINC00565    | NKX2-5 | PLOD1   | 4     |
| 188    | HIF1A-AS1  | E2F1   | NUSAP1  | 6     | 897    | LINC00565    | E2F1   | AURKB   | 5     |
| 189    | HIF1A-AS2  | E2F1   | HELLS   | 3     | 898    | LINC00565    | E2F4   | AURKB   | 5     |
| 190    | HIF1A-AS2  | CEBPB  | HP      | 4     | 899    | LINC00565    | AR     | KLK4    | 3     |
| 191    | HIF1A-AS2  | RUNX2  | IBSP    | 4     | 900    | LINC00565    | SPI1   | NCF1    | 6     |
| 192    | HIF1A-AS2  | IRF1   | IL10    | 6     | 901    | ELF3-AS1     | E2F1   | CDC25A  | 6     |
| 193    | HIF1A-AS2  | STAT1  | IL12A   | 6     | 902    | ELF3-AS1     | E2F1   | HELLS   | 6     |
| 194    | HIF1A-AS2  | IRF1   | IRF7    | 6     | 903    | ELF3-AS1     | FOXA2  | PDX1    | 3     |
| 195    | HIF1A-AS2  | RUNX2  | MMP13   | 5     | 904    | ELF3-AS1     | ETV7   | LYN     | 6     |
| 196    | HIF1A-AS2  | FOSL1  | PLAUR   | 6     | 905    | ELF3-AS1     | IRF4   | CIITA   | 6     |
| 197    | HIF1A-AS2  | STAT1  | PRF1    | 6     | 906    | ELF3-AS1     | E2F1   | POLE2   | 6     |
| 198    | HIF1A-AS2  | IRF1   | ISG15   | 6     | 907    | ELF3-AS1     | POU2F1 | PTGIR   | 4     |
| 199    | HIF1A-AS2  | SPI1   | ISG15   | 3     | 908    | ELF3-AS1     | E2F1   | AURKB   | 6     |
| 200    | HIF1A-AS2  | SPI1   | GPR132  | 6     | 909    | SLC16A1-AS1  | JUN    | ATF3    | 6     |
| 201    | HOTAIR     | IRF4   | B2M     | 5     | 910    | SLC16A1-AS1  | STAT6  | FCER2   | 4     |
| 202    | HOTAIR     | STAT1  | CD86    | 5     | 911    | SLC16A1-AS1  | IRF7   | CCL5    | 6     |
| 203    | HOTAIR     | IRF1   | CYBB    | 5     | 912    | SLC16A1-AS1  | IRF1   | FOXP3   | 5     |
| 204    | HOTAIR     | STAT1  | CYBB    | 5     | 913    | AGAP1-IT1    | USF1   | CYP19A1 | 4     |
| 205    | HOTAIR     | STAT1  | FCGR1A  | 5     | 914    | AGAP1-IT1    | E2F1   | HELLS   | 3     |
| 206    | HOTAIR     | STAT1  | ICAM1   | 5     | 915    | AGAP1-IT1    | IRF1   | CCL5    | 6     |
| 207    | HOTAIR     | STAT1  | IL2RA   | 5     | 916    | AGAP1-IT1    | E2F1   | AURKB   | 6     |
| 208    | HOTAIR     | CEBPB  | MEFV    | 3     | 917    | LINC02195    | RUNX2  | IBSP    | 3     |
| 209    | HOXA11-AS  | NFATC2 | FCER2   | 6     | 918    | RP11-82L18.2 | RELB   | B2M     | 6     |
| 210    | HOXA11-AS  | PAX5   | FCER2   | 6     | 919    | RP11-82L18.2 | STAT1  | CD86    | 6     |
| 211    | HOXA11-AS  | CEBPB  | HP      | 4     | 920    | RP11-82L18.2 | IRF1   | CYBB    | 6     |
| 212    | IGFL2-AS1  | POU2F1 | GNRHR   | 3     | 921    | RP11-82L18.2 | SPI1   | CYBB    | 6     |
| 213    | IGFL2-AS1  | POU2F2 | HLA-DRA | 6     | 922    | RP11-82L18.2 | STAT1  | CYBB    | 6     |
| 214    | IGFL2-AS1  | CEBPB  | HP      | 3     | 923    | RP11-82L18.2 | STAT1  | TYMP    | 6     |
| 215    | IGFL2-AS1  | IRF7   | IL12A   | 4     | 924    | RP11-82L18.2 | STAT1  | FCGR1A  | 6     |
| 216    | IGFL2-AS1  | SPI1   | ITGAM   | 6     | 925    | RP11-82L18.2 | IKZF1  | GZMB    | 6     |
| 217    | IGFL2-AS1  | FOSL1  | PLAU    | 4     | 926    | RP11-82L18.2 | RUNX2  | IBSP    | 4     |
| 218    | IGFL2-AS1  | SPI1   | PTGIR   | 6     | 927    | RP11-82L18.2 | IRF1   | IL10    | 6     |
| 219    | INHBA-AS1  | IRF4   | B2M     | 5     | 928    | RP11-82L18.2 | IRF1   | IL12A   | 3     |
| 220    | INHBA-AS1  | E2F1   | CDKN2A  | 5     | 929    | RP11-82L18.2 | IRF1   | IRF7    | 6     |
| 221    | INHBA-AS1  | E2F1   | HELLS   | 3     | 930    | RP11-82L18.2 | RUNX2  | MMP13   | 5     |
| 222    | INHBA-AS1  | STAT1  | ICAM1   | 6     | 931    | RP11-82L18.2 | STAT1  | PRF1    | 6     |
| 223    | INHBA-AS1  | IRF1   | CXCL10  | 5     | 932    | RP11-82L18.2 | STAT1  | PSMB9   | 6     |
| 224    | INHBA-AS1  | CEBPB  | DDIT4   | 6     | 933    | RP11-82L18.2 | E2F1   | AURKB   | 5     |
| 225    | KCNQ1OT1   | CEBPB  | HP      | 4     | 934    | RP11-82L18.2 | SPI1   | GPR132  | 6     |
| 226    | KCNQ1OT1   | NFATC2 | IRF4    | 5     | 935    | RP11-82L18.2 | STAT2  | IL21    | 6     |
| 227    | KCNQ1OT1   | CEBPB  | MEFV    | 3     | 936    | LINC01096    | STAT1  | IL2RA   | 6     |
| 228    | KRTAP5-AS1 | E2F1   | CDC25A  | 6     | 937    | LINC01096    | CEBPB  | PI3     | 6     |
| 229    | KRTAP5-AS1 | E2F1   | CDKN2A  | 6     | 938    | LINC01096    | STAT1  | PRF1    | 6     |
| 230    | KRTAP5-AS1 | NFATC2 | FCER2   | 4     | 939    | LINC01096    | STAT1  | SOAT1   | 5     |
| 231    | KRTAP5-AS1 | STAT1  | IDO1    | 6     | 940    | LINC01096    | E2F4   | AURKB   | 6     |
| 232    | KRTAP5-AS1 | STAT1  | CIITA   | 6     | 941    | LINC01096    | IRF5   | ISG15   | 6     |
| 233    | KRTAP5-AS1 | IRF5   | ISG15   | 6     | 942    | LINC01096    | STAT1  | IL21    | 6     |
| 234    | LINC00092  | RUNX2  | IBSP    | 3     | 943    | LINC01096    | STAT2  | IL21    | 6     |
| 235    | LINC00092  | RUNX2  | MMP13   | 6     | 944    | RP11-37B2.1  | E2F1   | HELLS   | 3     |
| 236    | LINC00460  | SPI1   | CYBB    | 6     | 945    | RP11-37B2.1  | STAT1  | MSR1    | 5     |



Table SI. Continued.

| Number | lncRNA    | TF     | Gene     | Class | Number | lncRNA       | TF     | Gene     | Class |
|--------|-----------|--------|----------|-------|--------|--------------|--------|----------|-------|
| 237    | LINC00460 | POU2F1 | GNRHR    | 3     | 946    | RP11-37B2.1  | FOXD1  | SERPINE1 | 3     |
| 238    | LINC00460 | IRF7   | IFNB1    | 6     | 947    | RP11-37B2.1  | E2F1   | TERT     | 3     |
| 239    | LINC00460 | SPI1   | PTGIR    | 5     | 948    | RP11-37B2.1  | E2F4   | AURKB    | 3     |
| 240    | LINC00460 | IRF1   | IFITM1   | 6     | 949    | MEF2C-AS1    | SPI1   | CD68     | 5     |
| 241    | LINC00460 | IRF1   | ISG15    | 6     | 950    | MEF2C-AS1    | IRF1   | IL12B    | 5     |
| 242    | LINC00461 | FUBP1  | BRCA1    | 6     | 951    | MEF2C-AS1    | NKX2-5 | PLOD1    | 4     |
| 243    | LINC00461 | E2F1   | CDKN2A   | 3     | 952    | MEF2C-AS1    | SPI1   | PTGIR    | 5     |
| 244    | LINC00461 | USF1   | CYP19A1  | 4     | 953    | MEF2C-AS1    | CEBPB  | DDIT4    | 5     |
| 245    | LINC00461 | STAT1  | IL12A    | 6     | 954    | C6orf3       | STAT6  | FCER2    | 4     |
| 246    | LINC00461 | E2F1   | POLE2    | 6     | 955    | C6orf3       | RUNX2  | IBSP     | 5     |
| 247    | LINC00461 | IRF1   | ISG15    | 6     | 956    | C6orf3       | RUNX2  | MMP13    | 5     |
| 248    | LINC00461 | CEBPB  | DDIT4    | 5     | 957    | C6orf3       | IRF1   | IFITM1   | 6     |
| 249    | LINC00511 | CDX2   | CA1      | 4     | 958    | RP11-598F7.3 | E2F1   | CDKN2A   | 5     |
| 250    | LINC00511 | IRF1   | IL12A    | 6     | 959    | RP11-598F7.3 | NFATC2 | FCER2    | 6     |
| 251    | LINC00511 | E2F1   | POLE2    | 6     | 960    | RP11-598F7.3 | IKZF1  | GZMB     | 5     |
| 252    | LINC00511 | IRF1   | IFITM1   | 6     | 961    | RP11-598F7.3 | AR     | KLK4     | 4     |
| 253    | LINC00514 | FOSL1  | IVL      | 3     | 962    | RP11-598F7.3 | SPI1   | GPR132   | 5     |
| 254    | LINC00514 | FOXD1  | SERPINE1 | 3     | 963    | RP11-598F7.3 | CDX2   | UGT1A8   | 3     |
| 255    | LINC00514 | E2F1   | POLE2    | 6     | 964    | LINC01234.1  | CDX2   | CA1      | 4     |
| 256    | LINC00628 | CDX2   | CA1      | 3     | 965    | LINC01234.1  | NFATC2 | FCER2    | 3     |
| 257    | LINC00628 | STAT1  | CD86     | 5     | 966    | LINC01234.1  | E2F1   | HELLS    | 3     |
| 258    | LINC00628 | USF1   | CYP19A1  | 3     | 967    | LINC01234.1  | JUN    | HMMR     | 1     |
| 259    | LINC00628 | IRF1   | IFIT2    | 3     | 968    | LINC01234.1  | SPI1   | ISG15    | 4     |
| 260    | LINC00628 | IRF1   | IFNB1    | 3     | 969    | LINC01234.1  | E2F1   | NUSAP1   | 6     |
| 261    | LINC00628 | IRF1   | CXCL10   | 6     | 970    | SNHG10       | PAX5   | FCER2    | 6     |
| 262    | LINC00628 | E2F1   | TERT     | 6     | 971    | SNHG10       | FOXA2  | PDX1     | 4     |
| 263    | LINC00628 | IRF1   | FOXP3    | 5     | 972    | SNHG10       | PAX5   | CIITA    | 6     |
| 264    | LINC00628 | IRF1   | IL27     | 6     | 973    | SNHG10       | IRF1   | ISG15    | 6     |
| 265    | LINC00629 | JUN    | ATF3     | 6     | 974    | KB-1460A1.1  | E2F1   | CDKN2A   | 6     |
| 266    | LINC00629 | STAT1  | IL12A    | 4     | 975    | KB-1460A1.1  | NFATC2 | CTLA4    | 5     |
| 267    | LINC00629 | STAT2  | IL12A    | 4     | 976    | KB-1460A1.1  | IRF1   | CTSS     | 5     |
| 268    | LINC00629 | IRF1   | CXCL10   | 5     | 977    | KB-1460A1.1  | NFATC2 | FCER2    | 5     |
| 269    | LINC00629 | STAT1  | SOAT1    | 5     | 978    | KB-1460A1.1  | ETV7   | LYN      | 5     |
| 270    | LINC00629 | IRF5   | ISG15    | 5     | 979    | KB-1460A1.1  | NFATC2 | TNFSF14  | 5     |
| 271    | LINC00629 | SPI1   | ISG15    | 5     | 980    | FOXCUT.1     | E2F1   | CDKN2A   | 3     |
| 272    | LINC00629 | E2F1   | NUSAP1   | 6     | 981    | FOXCUT.1     | SPI1   | ITGAM    | 6     |
| 273    | LINC00629 | CEBPB  | DDIT4    | 6     | 982    | FOXCUT.1     | FOSL1  | MMP1     | 3     |
| 274    | LINC00665 | STAT1  | IDO1     | 6     | 983    | FOXCUT.1     | FOXD1  | SERPINE1 | 3     |
| 275    | LINC00665 | ETV7   | LYN      | 6     | 984    | FOXCUT.1     | IRF7   | ISG15    | 5     |
| 276    | LINC00665 | NKX2-5 | PLOD1    | 3     | 985    | FOXD3-AS1.1  | IRF7   | CCL5     | 6     |
| 277    | LINC00665 | IRF7   | CCL5     | 6     | 986    | FOXD3-AS1.1  | STAT1  | SOAT1    | 3     |
| 278    | LINC00665 | IRF9   | CCL19    | 3     | 987    | FOXD3-AS1.1  | E2F4   | AURKB    | 6     |
| 279    | LINC00665 | STAT1  | WARS     | 6     | 988    | GAPLINC.1    | RELB   | B2M      | 6     |
| 280    | LINC00707 | POU2F1 | GNRHR    | 3     | 989    | GAPLINC.1    | FUBP1  | BRCA1    | 6     |
| 281    | LINC00707 | SPIB   | ITGAM    | 3     | 990    | GAPLINC.1    | CDX2   | CA1      | 4     |
| 282    | LINC00707 | IRF4   | CIITA    | 6     | 991    | GAPLINC.1    | STAT1  | TYMP     | 3     |
| 283    | LINC00707 | STAT1  | MSR1     | 5     | 992    | GAPLINC.1    | FOSL1  | PLAUR    | 6     |
| 284    | LINC00707 | CEBPB  | PI3      | 6     | 993    | LINC02154    | E2F1   | CDC25A   | 6     |
| 285    | LINC00857 | SPI1   | CYBB     | 6     | 994    | LINC02154    | PAX5   | FCER2    | 6     |
| 286    | LINC00857 | IRF1   | IFIT2    | 6     | 995    | LINC02154    | E2F1   | HELLS    | 6     |
| 287    | LINC00857 | IRF1   | IFNB1    | 3     | 996    | LINC02154    | FOSL1  | MMP1     | 4     |
| 288    | LINC00857 | SPI1   | ITGAM    | 6     | 997    | LINC02154    | E2F1   | POLE2    | 6     |
| 289    | LINC00857 | SPI1   | GPR132   | 6     | 998    | LINC02154    | E2F1   | NUSAP1   | 6     |
| 290    | LINC00880 | CDX2   | CA1      | 3     | 999    | LINC02154    | PAX5   | AICDA    | 6     |
| 291    | LINC00880 | SPI1   | CD68     | 6     | 1000   | LINC02154    | STAT1  | IL21     | 5     |
| 292    | LINC00880 | POU2F1 | GNRHR    | 3     | 1001   | LINC00887    | STAT1  | CYBB     | 5     |
| 293    | LINC00880 | IRF1   | IFIT2    | 6     | 1002   | LINC00887    | JUN    | HMMR     | 4     |
| 294    | LINC00880 | IRF7   | IFNB1    | 6     | 1003   | LINC00887    | IRF1   | CXCL10   | 5     |
| 295    | LINC00880 | NKX2-5 | PLOD1    | 3     | 1004   | LINC00887    | FOSL1  | IVL      | 4     |

Table SI. Continued.

| Number | lncRNA    | TF     | Gene    | Class | Number | lncRNA      | TF     | Gene   | Class |
|--------|-----------|--------|---------|-------|--------|-------------|--------|--------|-------|
| 296    | LINC00880 | CEBPB  | SLC11A1 | 6     | 1005   | LINC00887   | CEBPB  | PI3    | 4     |
| 297    | LINC00880 | IRF5   | ISG15   | 6     | 1006   | HIF1A-AS1.1 | E2F1   | CDC25A | 6     |
| 298    | LINC01006 | IRF4   | B2M     | 5     | 1007   | HIF1A-AS1.1 | E2F1   | CDKN2A | 6     |
| 299    | LINC01006 | POU2F1 | GNRHR   | 3     | 1008   | HIF1A-AS1.1 | JUN    | HMMR   | 1     |
| 300    | LINC01006 | IKZF1  | GZMB    | 6     | 1009   | HIF1A-AS1.1 | FOSL1  | IVL    | 4     |
| 301    | LINC01006 | STAT1  | IFNG    | 6     | 1010   | HIF1A-AS1.1 | E2F1   | POLE2  | 3     |
| 302    | LINC01006 | STAT1  | IDO1    | 6     | 1011   | HIF1A-AS1.1 | IRF1   | IFITM1 | 6     |
| 303    | LINC01006 | STAT1  | IRF1    | 6     | 1012   | HIF1A-AS1.1 | E2F1   | NUSAP1 | 6     |
| 304    | LINC01006 | IRF1   | STAT1   | 6     | 1013   | HIF1A-AS2.1 | E2F1   | HELLS  | 3     |
| 305    | LINC01006 | STAT1  | WARS    | 6     | 1014   | HIF1A-AS2.1 | CEBPB  | HP     | 4     |
| 306    | LINC01006 | SPI1   | ISG15   | 3     | 1015   | HIF1A-AS2.1 | RUNX2  | IBSP   | 4     |
| 307    | LINC01006 | IRF1   | XAF1    | 6     | 1016   | HIF1A-AS2.1 | IRF1   | IL10   | 6     |
| 308    | LINC01105 | IRF4   | B2M     | 5     | 1017   | HIF1A-AS2.1 | STAT1  | IL12A  | 6     |
| 309    | LINC01105 | RUNX2  | IBSP    | 3     | 1018   | HIF1A-AS2.1 | IRF1   | IRF7   | 6     |
| 310    | LINC01105 | IRF7   | IL12A   | 6     | 1019   | HIF1A-AS2.1 | RUNX2  | MMP13  | 5     |
| 311    | LINC01121 | STAT1  | CD86    | 6     | 1020   | HIF1A-AS2.1 | FOSL1  | PLAUR  | 6     |
| 312    | LINC01121 | SPI1   | CD68    | 5     | 1021   | HIF1A-AS2.1 | STAT1  | PRF1   | 6     |
| 313    | LINC01121 | E2F1   | CDC25A  | 6     | 1022   | HIF1A-AS2.1 | IRF1   | ISG15  | 6     |
| 314    | LINC01121 | STAT1  | TYMP    | 6     | 1023   | HIF1A-AS2.1 | SPI1   | ISG15  | 3     |
| 315    | LINC01121 | STAT1  | FCGR1A  | 6     | 1024   | HIF1A-AS2.1 | SPI1   | GPR132 | 6     |
| 316    | LINC01121 | POU2F1 | GNRHR   | 4     | 1025   | HOTAIR.1    | IRF4   | B2M    | 5     |
| 317    | LINC01121 | IRF1   | IL10    | 6     | 1026   | HOTAIR.1    | STAT1  | CD86   | 5     |
| 318    | LINC01121 | IRF1   | CXCL10  | 6     | 1027   | HOTAIR.1    | IRF1   | CYBB   | 5     |
| 319    | LINC01121 | IRF1   | IRF7    | 6     | 1028   | HOTAIR.1    | STAT1  | CYBB   | 5     |
| 320    | LINC01121 | SPI1   | NCF2    | 6     | 1029   | HOTAIR.1    | STAT1  | FCGR1A | 5     |
| 321    | LINC01121 | IRF1   | IFITM1  | 6     | 1030   | HOTAIR.1    | STAT1  | ICAM1  | 5     |
| 322    | LINC01121 | E2F1   | AURKB   | 6     | 1031   | HOTAIR.1    | STAT1  | IL2RA  | 5     |
| 323    | LINC01121 | IRF1   | ISG15   | 3     | 1032   | HOTAIR.1    | CEBPB  | MEFV   | 3     |
| 324    | LINC01121 | CDX2   | UGT1A8  | 4     | 1033   | HOXA11-AS.1 | NFATC2 | FCER2  | 6     |
| 325    | LINC01133 | PAX5   | CD19    | 5     | 1034   | HOXA11-AS.1 | PAX5   | FCER2  | 6     |
| 326    | LINC01133 | PAX5   | FCER2   | 4     | 1035   | HOXA11-AS.1 | CEBPB  | HP     | 4     |
| 327    | LINC01133 | IRF7   | IL12A   | 5     | 1036   | KCNQ1OT1.1  | CEBPB  | HP     | 4     |
| 328    | LINC01133 | IRF1   | IL12B   | 6     | 1037   | KCNQ1OT1.1  | NFATC2 | IRF4   | 5     |
| 329    | LINC01133 | CEBPB  | PI3     | 4     | 1038   | KCNQ1OT1.1  | CEBPB  | MEFV   | 3     |
| 330    | LINC01133 | E2F1   | POLE2   | 6     | 1039   | KCNQ1OT1.2  | CEBPB  | HP     | 4     |
| 331    | LINC01133 | E2F1   | NUSAP1  | 6     | 1040   | KCNQ1OT1.2  | NFATC2 | IRF4   | 5     |
| 332    | LINC01133 | PAX5   | AICDA   | 4     | 1041   | KCNQ1OT1.2  | CEBPB  | MEFV   | 3     |
| 333    | LINC01287 | FUBP1  | BRCA1   | 5     | 1042   | FAM30A      | E2F1   | POLE2  | 6     |
| 334    | LINC01287 | NFATC2 | CD3G    | 5     | 1043   | LINC00092.1 | RUNX2  | IBSP   | 3     |
| 335    | LINC01287 | E2F1   | CDKN2A  | 6     | 1044   | LINC00092.1 | RUNX2  | MMP13  | 6     |
| 336    | LINC01287 | STAT1  | TYMP    | 5     | 1045   | CYTOR.1     | STAT1  | CD86   | 6     |
| 337    | LINC01287 | STAT1  | FCGR1A  | 5     | 1046   | CYTOR.1     | STAT1  | TYMP   | 6     |
| 338    | LINC01287 | POU2F1 | GNRHR   | 3     | 1047   | CYTOR.1     | STAT1  | FCGR1A | 6     |
| 339    | LINC01287 | E2F1   | HELLS   | 5     | 1048   | PICSAR      | PAX5   | CIITA  | 5     |
| 340    | LINC01287 | STAT1  | IL2RA   | 5     | 1049   | PICSAR      | STAT1  | SOAT1  | 5     |
| 341    | LINC01287 | STAT1  | IDO1    | 5     | 1050   | LINC00511.1 | CDX2   | CA1    | 4     |
| 342    | LINC01287 | NFATC2 | IRF4    | 5     | 1051   | LINC00511.1 | IRF1   | IL12A  | 6     |
| 343    | LINC01287 | IRF4   | CIITA   | 5     | 1052   | LINC00511.1 | E2F1   | POLE2  | 6     |
| 344    | LINC01287 | PAX5   | CIITA   | 4     | 1053   | LINC00511.1 | IRF1   | IFITM1 | 6     |
| 345    | LINC01287 | NFATC2 | TNFSF14 | 4     | 1054   | LINC00629.1 | JUN    | ATF3   | 6     |
| 346    | LINC01287 | IRF1   | FOXP3   | 5     | 1055   | LINC00629.1 | STAT1  | IL12A  | 4     |
| 347    | LINC01503 | PAX5   | CD19    | 6     | 1056   | LINC00629.1 | STAT2  | IL12A  | 4     |
| 348    | LINC01503 | NFATC2 | FCER2   | 6     | 1057   | LINC00629.1 | IRF1   | CXCL10 | 5     |
| 349    | LINC01503 | PAX5   | FCER2   | 6     | 1058   | LINC00629.1 | STAT1  | SOAT1  | 5     |
| 350    | LINC01503 | IRF7   | IL12A   | 5     | 1059   | LINC00629.1 | IRF5   | ISG15  | 5     |
| 351    | LINC01503 | IRF1   | IL12B   | 6     | 1060   | LINC00629.1 | SPI1   | ISG15  | 5     |
| 352    | LINP1     | NFATC2 | CTLA4   | 6     | 1061   | LINC00629.1 | E2F1   | NUSAP1 | 6     |
| 353    | LINP1     | STAT1  | TYMP    | 6     | 1062   | LINC00629.1 | CEBPB  | DDIT4  | 6     |
| 354    | LINP1     | IRF1   | IFIT2   | 6     | 1063   | LINC01121.1 | STAT1  | CD86   | 6     |

Table S1. Continued.

| Number | lncRNA           | TF     | Gene    | Class | Number | lncRNA       | TF     | Gene    | Class |
|--------|------------------|--------|---------|-------|--------|--------------|--------|---------|-------|
| 355    | LINP1            | STAT1  | IL2RA   | 6     | 1064   | LINC01121.1  | SPI1   | CD68    | 5     |
| 356    | LINP1            | IRF7   | IL12A   | 5     | 1065   | LINC01121.1  | E2F1   | CDC25A  | 6     |
| 357    | LINP1            | SPIB   | ITGAM   | 3     | 1066   | LINC01121.1  | STAT1  | TYMP    | 6     |
| 358    | LINP1            | IRF4   | CIITA   | 6     | 1067   | LINC01121.1  | STAT1  | FCGR1A  | 6     |
| 359    | LINP1            | FOSL1  | PLAU    | 4     | 1068   | LINC01121.1  | POU2F1 | GNRHR   | 4     |
| 360    | LINP1            | E2F4   | AURKB   | 6     | 1069   | LINC01121.1  | IRF1   | IL10    | 6     |
| 361    | LL22NC03-N64E9.1 | STAT1  | CD86    | 5     | 1070   | LINC01121.1  | IRF1   | CXCL10  | 6     |
| 362    | LL22NC03-N64E9.1 | E2F1   | CDKN2A  | 6     | 1071   | LINC01121.1  | IRF1   | IRF7    | 6     |
| 363    | LL22NC03-N64E9.1 | JUN    | HMMR    | 1     | 1072   | LINC01121.1  | SPI1   | NCF2    | 6     |
| 364    | LL22NC03-N64E9.1 | IRF7   | IFNB1   | 5     | 1073   | LINC01121.1  | IRF1   | IFITM1  | 6     |
| 365    | LL22NC03-N64E9.1 | SPI1   | NCF2    | 5     | 1074   | LINC01121.1  | E2F1   | AURKB   | 6     |
| 366    | LL22NC03-N64E9.1 | CEBPB  | SLC11A1 | 5     | 1075   | LINC01121.1  | IRF1   | ISG15   | 3     |
| 367    | LL22NC03-N64E9.1 | E2F1   | TERT    | 5     | 1076   | LINC01121.1  | CDX2   | UGT1A8  | 4     |
| 368    | MIAT             | FUBP1  | BRCA1   | 6     | 1077   | LINC01139.1  | POU2F2 | HLA-DRA | 5     |
| 369    | MIAT             | CDX2   | CA1     | 4     | 1078   | LINC01139.1  | CEBPB  | HP      | 3     |
| 370    | MIAT             | JUN    | HMMR    | 1     | 1079   | LINC01139.1  | IRF1   | IFNB1   | 3     |
| 371    | MINCR            | STAT6  | FCER2   | 4     | 1080   | LINC01139.1  | IRF7   | IFNB1   | 6     |
| 372    | MINCR            | RUNX2  | IBSP    | 5     | 1081   | LINC01139.1  | SPI1   | ITGAM   | 6     |
| 373    | MINCR            | STAT1  | ICAM1   | 5     | 1082   | LINC01139.1  | VAV1   | ITGAM   | 6     |
| 374    | MINCR            | NKX2-5 | PLOD1   | 4     | 1083   | LINC01139.1  | PAX5   | CIITA   | 5     |
| 375    | MINCR            | STAT1  | SOAT1   | 4     | 1084   | LINC01139.1  | CEBPB  | DDIT4   | 6     |
| 376    | MIR155HG         | FUBP1  | BRCA1   | 6     | 1085   | LINC01139.1  | PAX5   | AICDA   | 3     |
| 377    | MIR155HG         | E2F1   | CDC25A  | 6     | 1086   | LINC00964    | IKZF1  | GZMB    | 6     |
| 378    | MIR155HG         | STAT6  | FCER2   | 4     | 1087   | LINC00964    | FOSL1  | IVL     | 4     |
| 379    | MIR155HG         | CEBPB  | HP      | 3     | 1088   | LINC00964    | RUNX2  | MMP13   | 5     |
| 380    | MIR210HG         | RELB   | B2M     | 6     | 1089   | LINC00964    | FOSL1  | PLAU    | 4     |
| 381    | MIR210HG         | IRF1   | IL10    | 6     | 1090   | LINC01315    | NFATC2 | CTLA4   | 5     |
| 382    | MIR210HG         | STAT1  | IL12A   | 6     | 1091   | LINC01315    | POU2F2 | HLA-DRA | 5     |
| 383    | MIR210HG         | IRF1   | IRF7    | 3     | 1092   | LINC01315    | PAX5   | CIITA   | 5     |
| 384    | MIR210HG         | E2F1   | POLE2   | 6     | 1093   | LINC01315    | NFATC2 | TNFSF14 | 5     |
| 385    | MIR210HG         | SPI1   | PTGIR   | 5     | 1094   | FAM3D-AS1    | STAT1  | CD86    | 5     |
| 386    | MIR210HG         | IRF7   | CCL5    | 6     | 1095   | FAM3D-AS1    | POU2F1 | GNRHR   | 3     |
| 387    | MIR210HG         | IRF9   | CCL19   | 6     | 1096   | FAM3D-AS1    | FOSL1  | IVL     | 3     |
| 388    | MIR210HG         | STAT1  | SOAT1   | 5     | 1097   | FAM3D-AS1    | CEBPB  | MEFV    | 3     |
| 389    | MIR210HG         | IRF1   | IFITM1  | 3     | 1098   | FAM3D-AS1    | IRF5   | ISG15   | 6     |
| 390    | MIR210HG         | IRF1   | ISG15   | 3     | 1099   | LINC01468    | USF1   | CYP19A1 | 3     |
| 391    | MIR210HG         | SPI1   | GPR132  | 6     | 1100   | LINC01468    | E2F1   | NUSAP1  | 6     |
| 392    | MIR503HG         | PAX5   | CD19    | 5     | 1101   | LINC01468    | CEBPB  | DDIT4   | 6     |
| 393    | MIR503HG         | STAT1  | TYMP    | 3     | 1102   | FRGCA        | IRF8   | CYBB    | 6     |
| 394    | MIR503HG         | PAX5   | FCER2   | 5     | 1103   | FRGCA        | STAT1  | CYBB    | 6     |
| 395    | MIR503HG         | PAX5   | CIITA   | 4     | 1104   | FRGCA        | POU2F1 | GNRHR   | 3     |
| 396    | MIR503HG         | IRF1   | IFITM1  | 3     | 1105   | FRGCA        | CEBPB  | HP      | 3     |
| 397    | MIR503HG         | AR     | KLK4    | 3     | 1106   | FRGCA        | NFATC2 | IRF4    | 6     |
| 398    | MIR503HG         | IKZF1  | IKZF3   | 5     | 1107   | FRGCA        | E2F4   | AURKB   | 6     |
| 399    | MNX1-AS1         | JUN    | HMMR    | 4     | 1108   | AC002454.1   | JUN    | ATF3    | 6     |
| 400    | MNX1-AS1         | SPIB   | ITGAM   | 5     | 1109   | AC002454.1   | FUBP1  | BRCA1   | 6     |
| 401    | MNX1-AS1         | NFATC2 | TNFSF14 | 6     | 1110   | AC002454.1   | NFATC2 | CD3G    | 6     |
| 402    | MNX1-AS1         | AR     | KLK4    | 4     | 1111   | AC002454.1   | NFATC2 | CD40LG  | 6     |
| 403    | MNX1-AS1         | IRF7   | ISG15   | 6     | 1112   | AC002454.1   | E2F1   | HELLS   | 6     |
| 404    | MYLK-AS1         | RUNX2  | IBSP    | 5     | 1113   | AC002454.1   | E2F1   | POLE2   | 6     |
| 405    | NCK1-AS1         | NFATC2 | CD3G    | 5     | 1114   | AC002454.1   | IRF9   | CCL19   | 6     |
| 406    | NCK1-AS1         | NFATC2 | CD40LG  | 5     | 1115   | CTD-3252C9.2 | USF1   | CYP19A1 | 3     |

Table SI. Continued.

| Number | lncRNA    | TF     | Gene    | Class | Number | lncRNA       | TF     | Gene     | Class |
|--------|-----------|--------|---------|-------|--------|--------------|--------|----------|-------|
| 407    | NCK1-AS1  | NFATC2 | CTLA4   | 5     | 1116   | CTD-3252C9.2 | POU2F2 | HLA-DRA  | 5     |
| 408    | NCK1-AS1  | PAX5   | FCER2   | 5     | 1117   | CTD-3252C9.2 | STAT1  | IL12A    | 6     |
| 409    | NCK1-AS1  | STAT1  | IL12A   | 5     | 1118   | CTD-3252C9.2 | FOSL1  | IVL      | 3     |
| 410    | NCK1-AS1  | STAT2  | IL12A   | 5     | 1119   | CTD-3252C9.2 | FOSL1  | MMP1     | 3     |
| 411    | NCK1-AS1  | NFATC2 | IRF4    | 5     | 1120   | CTD-3252C9.2 | FOXD1  | SERPINE1 | 3     |
| 412    | NCK1-AS1  | STAT1  | PRF1    | 5     | 1121   | CTD-3252C9.2 | NKX2-5 | PLOD1    | 3     |
| 413    | NCK1-AS1  | NFATC2 | TNFSF14 | 5     | 1122   | CTD-3252C9.2 | STAT1  | SOAT1    | 6     |
| 414    | NCK1-AS1  | E2F1   | AURKB   | 6     | 1123   | CTD-3252C9.2 | E2F1   | TERT     | 3     |
| 415    | NCK1-AS1  | STAT1  | XAF1    | 5     | 1124   | CTD-3252C9.2 | STAT1  | WARS     | 6     |
| 416    | NCK1-AS1  | SPI1   | NCF1    | 5     | 1125   | CTD-3252C9.2 | NFATC2 | TNFSF14  | 6     |
| 417    | NKILA     | CDX2   | CA1     | 3     | 1126   | CTD-3252C9.2 | E2F1   | NUSAP1   | 6     |
| 418    | NKILA     | E2F1   | CDKN2A  | 3     | 1127   | MIAT.1       | FUBP1  | BRCA1    | 6     |
| 419    | NKILA     | IRF1   | IFNB1   | 3     | 1128   | MIAT.1       | CDX2   | CA1      | 4     |
| 420    | NKILA     | IRF7   | IFNB1   | 3     | 1129   | MIAT.1       | JUN    | HMMR     | 1     |
| 421    | NKILA     | IRF7   | IL12A   | 3     | 1130   | MINCR.1      | STAT6  | FCER2    | 4     |
| 422    | NKILA     | STAT1  | IDO1    | 6     | 1131   | MINCR.1      | RUNX2  | IBSP     | 5     |
| 423    | NKILA     | IRF1   | IRF7    | 6     | 1132   | MINCR.1      | STAT1  | ICAM1    | 5     |
| 424    | NKILA     | STAT1  | PRF1    | 6     | 1133   | MINCR.1      | NKX2-5 | PLOD1    | 4     |
| 425    | NKILA     | CEBPB  | DDIT4   | 6     | 1134   | MINCR.1      | STAT1  | SOAT1    | 4     |
| 426    | NKILA     | IRF1   | XAF1    | 3     | 1135   | MIR155HG.1   | FUBP1  | BRCA1    | 6     |
| 427    | NKILA     | STAT1  | IL21    | 6     | 1136   | MIR155HG.1   | E2F1   | CDC25A   | 6     |
| 428    | OGFRP1    | FUBP1  | BRCA1   | 6     | 1137   | MIR155HG.1   | STAT6  | FCER2    | 4     |
| 429    | OGFRP1    | SPI1   | CD68    | 6     | 1138   | MIR155HG.1   | CEBPB  | HP       | 3     |
| 430    | OGFRP1    | E2F1   | CDC25A  | 6     | 1139   | MIR503HG.1   | PAX5   | CD19     | 5     |
| 431    | OGFRP1    | IRF1   | CYBB    | 5     | 1140   | MIR503HG.1   | STAT1  | TYMP     | 3     |
| 432    | OGFRP1    | E2F1   | HELLS   | 3     | 1141   | MIR503HG.1   | PAX5   | FCER2    | 5     |
| 433    | OGFRP1    | E2F1   | AURKB   | 6     | 1142   | MIR503HG.1   | PAX5   | CIITA    | 4     |
| 434    | PCAT6     | CDX2   | CA1     | 4     | 1143   | MIR503HG.1   | IRF1   | IFITM1   | 3     |
| 435    | PCAT6     | E2F1   | CDC25A  | 6     | 1144   | MIR503HG.1   | AR     | KLK4     | 3     |
| 436    | PCAT6     | E2F1   | CDKN2A  | 3     | 1145   | MIR503HG.1   | IKZF1  | IKZF3    | 5     |
| 437    | PCAT6     | E2F1   | HELLS   | 6     | 1146   | MNX1-AS1.1   | JUN    | HMMR     | 4     |
| 438    | PCAT6     | JUN    | HMMR    | 1     | 1147   | MNX1-AS1.1   | SPIB   | ITGAM    | 5     |
| 439    | PCAT6     | FOSL1  | PLAUR   | 6     | 1148   | MNX1-AS1.1   | NFATC2 | TNFSF14  | 6     |
| 440    | PCAT6     | E2F1   | POLE2   | 6     | 1149   | MNX1-AS1.1   | AR     | KLK4     | 4     |
| 441    | PCAT6     | E2F4   | AURKB   | 6     | 1150   | MNX1-AS1.1   | IRF7   | ISG15    | 6     |
| 442    | PCAT6     | E2F1   | NUSAP1  | 6     | 1151   | LPP-AS2      | FUBP1  | BRCA1    | 5     |
| 443    | PCAT7     | CDX2   | CA1     | 4     | 1152   | LPP-AS2      | CDX2   | CA1      | 4     |
| 444    | PCAT7     | STAT1  | CD86    | 5     | 1153   | LPP-AS2      | SPI1   | CD68     | 5     |
| 445    | PCAT7     | STAT1  | FCGR1A  | 4     | 1154   | LPP-AS2      | USF1   | CYP19A1  | 5     |
| 446    | PCAT7     | POU2F1 | GNRHR   | 4     | 1155   | LPP-AS2      | IRF1   | IL12B    | 3     |
| 447    | PCAT7     | IRF1   | CXCL10  | 5     | 1156   | LINC00592    | NFATC2 | CD3G     | 5     |
| 448    | PCAT7     | STAT1  | PRF1    | 5     | 1157   | LINC00592    | NFATC2 | CD40LG   | 5     |
| 449    | PCAT7     | AR     | KLK4    | 4     | 1158   | LINC00592    | NFATC2 | CTLA4    | 5     |
| 450    | PRC1-AS1  | E2F1   | CDC25A  | 6     | 1159   | LINC00592    | STAT1  | CYBB     | 5     |
| 451    | PRC1-AS1  | FOSL1  | MMP1    | 3     | 1160   | LINC00592    | POU2F1 | GNRHR    | 3     |
| 452    | PRC1-AS1  | NKX2-5 | PLOD1   | 3     | 1161   | LINC00592    | SPI1   | PTGIR    | 6     |
| 453    | PRC1-AS1  | CEBPB  | DDIT4   | 5     | 1162   | LINC00592    | AR     | KLK4     | 6     |
| 454    | PVT1      | NFATC2 | CD40LG  | 6     | 1163   | LINC00592    | E2F1   | NUSAP1   | 6     |
| 455    | PVT1      | PAX5   | FCER2   | 6     | 1164   | LINC00592    | CEBPB  | DDIT4    | 6     |
| 456    | PVT1      | E2F1   | HELLS   | 6     | 1165   | LEF1-AS1.1   | SPI1   | CD68     | 5     |
| 457    | PVT1      | IRF1   | IL12A   | 6     | 1166   | LINC00944    | CDX2   | CA1      | 4     |
| 458    | PVT1      | NFATC2 | TNFSF14 | 6     | 1167   | LINC00944    | PAX5   | CD19     | 5     |
| 459    | RHPN1-AS1 | RUNX2  | IBSP    | 3     | 1168   | LINC00944    | PAX5   | FCER2    | 5     |
| 460    | RHPN1-AS1 | FOSL1  | IVL     | 3     | 1169   | LINC00944    | E2F1   | HELLS    | 3     |
| 461    | RHPN1-AS1 | PAX5   | CIITA   | 3     | 1170   | LINC00944    | PAX5   | CIITA    | 4     |
| 462    | RHPN1-AS1 | IRF7   | CCL5    | 6     | 1171   | LINC00944    | NKX2-5 | PLOD1    | 4     |
| 463    | RHPN1-AS1 | IRF9   | CCL19   | 6     | 1172   | LINC00944    | AR     | KLK4     | 5     |
| 464    | RHPN1-AS1 | E2F4   | AURKB   | 6     | 1173   | THAP9-AS1    | IRF1   | IFIT2    | 6     |
| 465    | RHPN1-AS1 | STAT1  | IL21    | 6     | 1174   | THAP9-AS1    | CEBPB  | MEFV     | 3     |



Table SI. Continued.

| Number | lncRNA         | TF     | Gene     | Class | Number | lncRNA         | TF     | Gene    | Class |
|--------|----------------|--------|----------|-------|--------|----------------|--------|---------|-------|
| 466    | RP11-169D4.2   | POU2F1 | GNRHR    | 3     | 1175   | THAP9-AS1      | IRF1   | IFITM1  | 6     |
| 467    | RP11-169D4.2   | NKX2-5 | PLOD1    | 4     | 1176   | THAP9-AS1      | E2F4   | AURKB   | 6     |
| 468    | RP11-169D4.2   | E2F1   | POLE2    | 6     | 1177   | THAP9-AS1      | SPI1   | ISG15   | 6     |
| 469    | RP11-175D17.3  | IRF4   | B2M      | 6     | 1178   | THAP9-AS1      | CEBPB  | DDIT4   | 5     |
| 470    | RP11-175D17.3  | PAX5   | CD19     | 6     | 1179   | LINC00601      | STAT1  | CD86    | 6     |
| 471    | RP11-175D17.3  | PAX5   | FCER2    | 6     | 1180   | LINC00601      | SPI1   | CD68    | 5     |
| 472    | RP11-175D17.3  | CEBPB  | HP       | 4     | 1181   | LINC00601      | STAT1  | CYBB    | 6     |
| 473    | RP11-175D17.3  | IRF1   | IL12B    | 3     | 1182   | LINC00601      | STAT1  | TYMP    | 6     |
| 474    | RP11-175D17.3  | PAX5   | CIITA    | 3     | 1183   | LINC00601      | STAT1  | FCGR1A  | 6     |
| 475    | RP11-175D17.3  | CEBPB  | PI3      | 4     | 1184   | LINC00601      | RUNX2  | IBSP    | 4     |
| 476    | RP11-175D17.3  | FOSL1  | PLAUR    | 6     | 1185   | LINC00601      | PAX5   | CIITA   | 5     |
| 477    | RP11-175D17.3  | IRF9   | CCL19    | 3     | 1186   | LINC00601      | RUNX2  | MMP13   | 4     |
| 478    | RP11-175D17.3  | PAX5   | AICDA    | 6     | 1187   | LINC00601      | STAT1  | PRF1    | 6     |
| 479    | RP11-199F11-2  | NFATC2 | CTLA4    | 5     | 1188   | LINC00601      | NFATC2 | TNFSF14 | 6     |
| 480    | RP11-199F11-2  | STAT6  | FCER2    | 4     | 1189   | PACERR         | USF1   | CYP19A1 | 5     |
| 481    | RP11-199F11-2  | IRF4   | CIITA    | 5     | 1190   | PCAT6.1        | CDX2   | CA1     | 4     |
| 482    | RP11-199F11-2  | FOXD1  | SERPINE1 | 3     | 1191   | PCAT6.1        | E2F1   | CDC25A  | 6     |
| 483    | RP11-304L19.11 | PAX5   | CD19     | 5     | 1192   | PCAT6.1        | E2F1   | CDKN2A  | 3     |
| 484    | RP11-304L19.11 | IRF1   | IL10     | 6     | 1193   | PCAT6.1        | E2F1   | HELLS   | 6     |
| 485    | RP11-304L19.11 | IRF1   | IL12A    | 3     | 1194   | PCAT6.1        | JUN    | HMMR    | 1     |
| 486    | RP11-304L19.11 | SPI1   | NCF2     | 6     | 1195   | PCAT6.1        | FOSL1  | PLAUR   | 6     |
| 487    | RP11-304L19.11 | IRF1   | IFITM1   | 6     | 1196   | PCAT6.1        | E2F1   | POLE2   | 6     |
| 488    | RP11-304L19.11 | PAX5   | AICDA    | 5     | 1197   | PCAT6.1        | E2F4   | AURKB   | 6     |
| 489    | RP11-305O4.3   | IRF4   | B2M      | 6     | 1198   | PCAT6.1        | E2F1   | NUSAP1  | 6     |
| 490    | RP11-305O4.3   | IRF1   | IFIT2    | 5     | 1199   | PCAT7.1        | CDX2   | CA1     | 4     |
| 491    | RP11-305O4.3   | IRF4   | CIITA    | 6     | 1200   | PCAT7.1        | STAT1  | CD86    | 5     |
| 492    | RP11-305O4.3   | SPI1   | PTGIR    | 6     | 1201   | PCAT7.1        | STAT1  | FCGR1A  | 4     |
| 493    | RP11-351J23.2  | CEBPZ  | COL1A1   | 2     | 1202   | PCAT7.1        | POU2F1 | GNRHR   | 4     |
| 494    | RP11-351J23.2  | USF1   | CYP19A1  | 5     | 1203   | PCAT7.1        | IRF1   | CXCL10  | 5     |
| 495    | RP11-351J23.2  | POU2F1 | GNRHR    | 3     | 1204   | PCAT7.1        | STAT1  | PRF1    | 5     |
| 496    | RP11-351J23.2  | STAT2  | IL12A    | 6     | 1205   | PCAT7.1        | AR     | KLK4    | 4     |
| 497    | RP11-351J23.2  | IRF1   | IRF7     | 6     | 1206   | PVT1.1         | NFATC2 | CD40LG  | 6     |
| 498    | RP11-351J23.2  | CEBPB  | SLC11A1  | 3     | 1207   | PVT1.1         | PAX5   | FCER2   | 6     |
| 499    | RP11-351J23.2  | NFATC2 | TNFSF14  | 6     | 1208   | PVT1.1         | E2F1   | HELLS   | 6     |
| 500    | RP11-351J23.2  | CEBPB  | DDIT4    | 5     | 1209   | PVT1.1         | IRF1   | IL12A   | 6     |
| 501    | RP11-351J23.2  | STAT2  | IL21     | 6     | 1210   | PVT1.1         | NFATC2 | TNFSF14 | 6     |
| 502    | RP11-624C23.1  | POU2F1 | GNRHR    | 4     | 1211   | RHPN1-AS1.1    | RUNX2  | IBSP    | 3     |
| 503    | RP11-624C23.1  | E2F1   | HELLS    | 3     | 1212   | RHPN1-AS1.1    | FOSL1  | IVL     | 3     |
| 504    | RP11-624C23.1  | SPI1   | PTGIR    | 6     | 1213   | RHPN1-AS1.1    | PAX5   | CIITA   | 3     |
| 505    | RP11-79H23.3   | E2F1   | CDC25A   | 3     | 1214   | RHPN1-AS1.1    | IRF7   | CCL5    | 6     |
| 506    | RP11-79H23.3   | STAT6  | FCER2    | 4     | 1215   | RHPN1-AS1.1    | IRF9   | CCL19   | 6     |
| 507    | RP11-79H23.3   | CEBPB  | HP       | 3     | 1216   | RHPN1-AS1.1    | E2F4   | AURKB   | 6     |
| 508    | RP11-79H23.3   | PAX5   | CIITA    | 4     | 1217   | RHPN1-AS1.1    | STAT1  | IL21    | 6     |
| 509    | RP11-79H23.3   | E2F1   | POLE2    | 3     | 1218   | RP11.169D4.2.2 | POU2F1 | GNRHR   | 3     |
| 510    | RP11-79H23.3   | AR     | KLK4     | 4     | 1219   | RP11.169D4.2.2 | NKX2-5 | PLOD1   | 4     |
| 511    | RP11-838N2.5   | NFATC2 | CTLA4    | 6     | 1220   | RP11.169D4.2.2 | E2F1   | POLE2   | 6     |
| 512    | RP11-838N2.5   | RUNX2  | IBSP     | 6     | 1221   | KCNMB2-AS1     | RELB   | B2M     | 5     |
| 513    | RP11-838N2.5   | IRF1   | IL12B    | 5     | 1222   | KCNMB2-AS1     | E2F1   | CDKN2A  | 3     |
| 514    | RP11-838N2.5   | CEBPB  | MEFV     | 3     | 1223   | KCNMB2-AS1     | FOSL1  | IVL     | 4     |
| 515    | RP11-838N2.5   | RUNX2  | MMP13    | 6     | 1224   | KCNMB2-AS1     | E2F1   | POLE2   | 6     |
| 516    | RP11-838N2.5   | NKX2-5 | PLOD1    | 3     | 1225   | LINC01833      | IRF4   | B2M     | 6     |
| 517    | RP11-838N2.5   | NFATC2 | TNFSF14  | 6     | 1226   | LINC01833      | IRF8   | B2M     | 6     |
| 518    | RP11-909N17.2  | CEBPZ  | COL1A1   | 2     | 1227   | LINC01833      | FUBP1  | BRCA1   | 3     |
| 519    | RP11-909N17.2  | IRF1   | CYBB     | 5     | 1228   | LINC01833      | CDX2   | CA1     | 3     |
| 520    | RP11-909N17.2  | POU2F1 | PTGIR    | 3     | 1229   | LINC01833      | NFATC2 | FCER2   | 5     |
| 521    | RP3-508I15.14  | RELB   | B2M      | 5     | 1230   | LINC01833      | PAX5   | FCER2   | 5     |
| 522    | RP3-508I15.14  | IRF1   | CYBB     | 5     | 1231   | LINC01833      | IRF1   | IFIT2   | 6     |
| 523    | RP3-508I15.14  | STAT1  | CYBB     | 5     | 1232   | LINC01833      | IRF1   | IFNB1   | 6     |
| 524    | RP3-508I15.14  | USF1   | CYP19A1  | 4     | 1233   | LINC01833      | IRF1   | IL12A   | 6     |

Table S1. Continued.

| Number | lncRNA        | TF     | Gene    | Class | Number | lncRNA    | TF     | Gene     | Class |
|--------|---------------|--------|---------|-------|--------|-----------|--------|----------|-------|
| 525    | RP3-508I15.14 | IRF1   | IFIT2   | 4     | 1234   | LINC01833 | IRF7   | IL12A    | 3     |
| 526    | RP3-508I15.14 | IRF1   | IFNB1   | 4     | 1235   | LINC01833 | STAT1  | IL12A    | 6     |
| 527    | RP3-508I15.14 | STAT1  | IDO1    | 5     | 1236   | LINC01833 | STAT2  | IL12A    | 3     |
| 528    | RP3-508I15.14 | STAT1  | IRF1    | 5     | 1237   | LINC01833 | CEBPB  | MEFV     | 3     |
| 529    | RP3-508I15.14 | ETV7   | LYN     | 5     | 1238   | LINC01833 | IRF9   | CCL19    | 6     |
| 530    | RP3-508I15.14 | STAT1  | CIITA   | 5     | 1239   | LINC01833 | IRF5   | ISG15    | 3     |
| 531    | RP3-508I15.14 | STAT1  | PRF1    | 5     | 1240   | LINC01833 | STAT1  | IL21     | 6     |
| 532    | RP3-508I15.14 | IRF9   | CCL19   | 4     | 1241   | LINC01833 | IRF1   | IL27     | 6     |
| 533    | RP3-508I15.14 | IRF1   | STAT1   | 5     | 1242   | SNHG1.1   | STAT6  | FCER2    | 5     |
| 534    | RP3-508I15.14 | IRF1   | IFITM1  | 4     | 1243   | SNHG12.1  | IRF4   | CIITA    | 5     |
| 535    | RP3-508I15.14 | SPI1   | ISG15   | 5     | 1244   | SNHG12.1  | FOSL1  | PLAUR    | 6     |
| 536    | RP3-508I15.14 | IRF1   | XAF1    | 5     | 1245   | SNHG15.1  | PAX5   | FCER2    | 6     |
| 537    | RP3-508I15.14 | STAT1  | IL21    | 5     | 1246   | SNHG15.1  | IRF1   | IL12B    | 6     |
| 538    | RP5-884M6.1   | SPI1   | CYBB    | 6     | 1247   | SNHG15.1  | SPIB   | ITGAM    | 5     |
| 539    | RP5-884M6.1   | USF1   | CYP19A1 | 4     | 1248   | SNHG15.1  | PAX5   | CIITA    | 3     |
| 540    | RP5-884M6.1   | STAT1  | TYMP    | 3     | 1249   | SNHG15.1  | POU2F1 | PTGIR    | 3     |
| 541    | RP5-884M6.1   | IRF1   | IFNB1   | 3     | 1250   | SNHG15.1  | IRF7   | ISG15    | 5     |
| 542    | RP5-884M6.1   | IRF1   | IL10    | 6     | 1251   | SNHG16.1  | SPIB   | ITGAM    | 5     |
| 543    | RP5-884M6.1   | IRF7   | IL12A   | 3     | 1252   | SNHG16.1  | STAT1  | MSR1     | 6     |
| 544    | RP5-884M6.1   | IRF1   | CXCL10  | 6     | 1253   | SNHG16.1  | SPI1   | NCF2     | 5     |
| 545    | RP5-884M6.1   | FOSL1  | IVL     | 4     | 1254   | SNHG16.1  | NKX2-5 | PLOD1    | 3     |
| 546    | RP5-884M6.1   | STAT1  | PSMB9   | 6     | 1255   | SNHG16.1  | IRF9   | CCL19    | 6     |
| 547    | RP5-884M6.1   | SPI1   | PTGIR   | 5     | 1256   | SNHG16.1  | SPI1   | ISG15    | 3     |
| 548    | RP5-884M6.1   | IRF1   | IFITM1  | 3     | 1257   | SNHG16.1  | CEBPB  | DDIT4    | 5     |
| 549    | RP5-884M6.1   | IRF1   | ISG15   | 6     | 1258   | SNHG3.1   | ETV7   | LYN      | 6     |
| 550    | RP5-884M6.1   | E2F1   | NUSAP1  | 6     | 1259   | SNHG3.1   | IRF4   | CIITA    | 5     |
| 551    | SH3PXD2A-AS1  | E2F1   | HELLS   | 3     | 1260   | SNHG3.1   | FOSL1  | PLAUR    | 6     |
| 552    | SH3PXD2A-AS1  | IRF1   | IL10    | 6     | 1261   | SNHG6.1   | PAX5   | CD19     | 6     |
| 553    | SH3PXD2A-AS1  | IRF1   | IL12A   | 3     | 1262   | SNHG6.1   | PAX5   | FCER2    | 6     |
| 554    | SH3PXD2A-AS1  | PAX5   | CIITA   | 5     | 1263   | SNHG6.1   | POU2F2 | HLA-DRA  | 5     |
| 555    | SH3PXD2A-AS1  | E2F1   | POLE2   | 6     | 1264   | SNHG6.1   | IRF1   | IL12B    | 5     |
| 556    | SH3PXD2A-AS1  | IRF9   | CCL19   | 6     | 1265   | TCL6.1    | STAT1  | CYBB     | 5     |
| 557    | SH3PXD2A-AS1  | NFATC2 | TNFSF14 | 6     | 1266   | TCL6.1    | JUN    | HMMR     | 1     |
| 558    | SH3PXD2A-AS1  | E2F1   | NUSAP1  | 6     | 1267   | TCL6.1    | IRF1   | CXCL10   | 6     |
| 559    | SLCO4A1-AS1   | RUNX2  | IBSP    | 3     | 1268   | TCL6.1    | RUNX2  | MMP13    | 5     |
| 560    | SLCO4A1-AS1   | STAT2  | IL12A   | 3     | 1269   | TCL6.1    | FOXD1  | SERPINE1 | 4     |
| 561    | SLCO4A1-AS1   | SPI1   | ITGAM   | 5     | 1270   | TCL6.1    | STAT1  | PRF1     | 5     |
| 562    | SLCO4A1-AS1   | RUNX2  | MMP13   | 6     | 1271   | TCL6.1    | IRF1   | IFITM1   | 6     |
| 563    | SNHG1         | STAT6  | FCER2   | 5     | 1272   | TCL6.1    | AR     | KLK4     | 4     |
| 564    | SNHG12        | IRF4   | CIITA   | 5     | 1273   | TCL6.1    | IRF5   | ISG15    | 6     |
| 565    | SNHG12        | FOSL1  | PLAUR   | 6     | 1274   | TCL6.1    | IRF7   | ISG15    | 6     |
| 566    | SNHG15        | PAX5   | FCER2   | 6     | 1275   | IFNG-AS1  | STAT6  | FCER2    | 4     |
| 567    | SNHG15        | IRF1   | IL12B   | 6     | 1276   | IFNG-AS1  | SPI1   | GPR132   | 5     |
| 568    | SNHG15        | SPIB   | ITGAM   | 5     | 1277   | TUG1.1    | E2F1   | CDKN2A   | 3     |
| 569    | SNHG15        | PAX5   | CIITA   | 3     | 1278   | LINC01426 | PAX5   | CD19     | 5     |
| 570    | SNHG15        | POU2F1 | PTGIR   | 3     | 1279   | LINC01426 | STAT1  | CD86     | 6     |
| 571    | SNHG15        | IRF7   | ISG15   | 5     | 1280   | LINC01426 | STAT1  | TYMP     | 6     |
| 572    | SNHG16        | SPIB   | ITGAM   | 5     | 1281   | LINC01426 | NFATC2 | FCER2    | 6     |
| 573    | SNHG16        | STAT1  | MSR1    | 6     | 1282   | LINC01426 | STAT1  | FCGR1A   | 6     |
| 574    | SNHG16        | SPI1   | NCF2    | 5     | 1283   | LINC01426 | POU2F1 | GNRHR    | 4     |
| 575    | SNHG16        | NKX2-5 | PLOD1   | 3     | 1284   | LINC01426 | JUN    | HMMR     | 4     |
| 576    | SNHG16        | IRF9   | CCL19   | 6     | 1285   | LINC01426 | IRF1   | IL10     | 6     |
| 577    | SNHG16        | SPI1   | ISG15   | 3     | 1286   | LINC01426 | IRF1   | IL12A    | 3     |
| 578    | SNHG16        | CEBPB  | DDIT4   | 5     | 1287   | LINC01426 | IRF7   | IL12A    | 3     |
| 579    | SNHG17        | IRF4   | B2M     | 5     | 1288   | LINC01426 | IRF1   | IRF7     | 6     |
| 580    | SNHG17        | STAT1  | IL2RA   | 5     | 1289   | LINC01426 | FOSL1  | IVL      | 4     |
| 581    | SNHG17        | IRF1   | IRF7    | 5     | 1290   | LINC01426 | PAX5   | CIITA    | 4     |
| 582    | SNHG17        | IRF5   | ISG15   | 5     | 1291   | LINC01426 | SPI1   | PTGIR    | 5     |
| 583    | SNHG17        | IRF1   | IL27    | 5     | 1292   | LINC01426 | IRF1   | IFITM1   | 6     |

Table SI. Continued.

| Number | lncRNA     | TF     | Gene     | Class | Number | lncRNA       | TF     | Gene    | Class |
|--------|------------|--------|----------|-------|--------|--------------|--------|---------|-------|
| 584    | SNHG3      | ETV7   | LYN      | 6     | 1293   | LINC01426    | IRF1   | ISG15   | 6     |
| 585    | SNHG3      | IRF4   | CIITA    | 5     | 1294   | LINC01589    | NFATC2 | CD3G    | 6     |
| 586    | SNHG3      | FOSL1  | PLAUR    | 6     | 1295   | LINC01589    | PAX5   | CD19    | 6     |
| 587    | SNHG6      | PAX5   | CD19     | 6     | 1296   | LINC01589    | E2F1   | CDC25A  | 5     |
| 588    | SNHG6      | PAX5   | FCER2    | 6     | 1297   | LINC01589    | E2F1   | CDKN2A  | 4     |
| 589    | SNHG6      | POU2F2 | HLA-DRA  | 5     | 1298   | LINC01589    | NFATC2 | CTLA4   | 6     |
| 590    | SNHG6      | IRF1   | IL12B    | 5     | 1299   | LINC01589    | NFATC2 | FCER2   | 3     |
| 591    | TCL6       | STAT1  | CYBB     | 5     | 1300   | LINC01589    | PAX5   | FCER2   | 6     |
| 592    | TCL6       | JUN    | HMMR     | 1     | 1301   | LINC01589    | POU2F1 | GNRHR   | 4     |
| 593    | TCL6       | IRF1   | CXCL10   | 6     | 1302   | LINC01589    | CEBPB  | HP      | 4     |
| 594    | TCL6       | RUNX2  | MMP13    | 5     | 1303   | LINC01589    | PAX5   | CIITA   | 3     |
| 595    | TCL6       | FOXD1  | SERPINE1 | 4     | 1304   | LINC01589    | NFATC2 | TNFSF14 | 6     |
| 596    | TCL6       | STAT1  | PRF1     | 5     | 1305   | LINC01589    | E2F1   | AURKB   | 5     |
| 597    | TCL6       | IRF1   | IFITM1   | 6     | 1306   | LINC01589    | PAX5   | AICDA   | 3     |
| 598    | TCL6       | AR     | KLK4     | 4     | 1307   | RP11-553L6.5 | IRF1   | CYBB    | 6     |
| 599    | TCL6       | IRF5   | ISG15    | 6     | 1308   | RP11-553L6.5 | STAT1  | CYBB    | 6     |
| 600    | TCL6       | IRF7   | ISG15    | 6     | 1309   | RP11-553L6.5 | PAX5   | CIITA   | 5     |
| 601    | TUG1       | E2F1   | CDKN2A   | 3     | 1310   | RP11-553L6.5 | CEBPB  | PI3     | 3     |
| 602    | UXT-AS1    | STAT1  | TYMP     | 3     | 1311   | RP11-553L6.5 | STAT1  | PRF1    | 6     |
| 603    | UXT-AS1    | STAT6  | FCER2    | 4     | 1312   | LINC00494    | FOSL1  | PLAU    | 4     |
| 604    | UXT-AS1    | STAT1  | IL12A    | 6     | 1313   | LINC00494    | E2F4   | AURKB   | 6     |
| 605    | UXT-AS1    | PAX5   | AICDA    | 5     | 1314   | LINC00494    | SPI1   | ISG15   | 3     |
| 606    | VIM-AS1    | JUN    | ATF3     | 6     | 1315   | VPS9D1-AS1.1 | E2F1   | HELLS   | 3     |
| 607    | VIM-AS1    | USF1   | CYP19A1  | 3     | 1316   | VPS9D1-AS1.1 | STAT1  | IL12A   | 5     |
| 608    | VIM-AS1    | POU2F1 | GNRHR    | 3     | 1317   | VPS9D1-AS1.1 | FOXA2  | PDX1    | 6     |
| 609    | VIM-AS1    | CEBPB  | HP       | 3     | 1318   | VPS9D1-AS1.1 | FOSL1  | MMP1    | 3     |
| 610    | VIM-AS1    | IRF1   | IFNB1    | 3     | 1319   | VPS9D1-AS1.1 | IRF9   | CCL19   | 6     |
| 611    | VIM-AS1    | IRF7   | IFNB1    | 6     | 1320   | VPS9D1-AS1.1 | E2F1   | TERT    | 3     |
| 612    | VIM-AS1    | SPIB   | ITGAM    | 6     | 1321   | VPS9D1-AS1.1 | E2F1   | NUSAP1  | 6     |
| 613    | VIM-AS1    | NKX2-5 | PLOD1    | 3     | 1322   | WT1-AS.1     | RELB   | B2M     | 6     |
| 614    | VPS9D1-AS1 | E2F1   | HELLS    | 3     | 1323   | WT1-AS.1     | CDX2   | CA1     | 4     |
| 615    | VPS9D1-AS1 | STAT1  | IL12A    | 5     | 1324   | WT1-AS.1     | SPI1   | CD68    | 5     |
| 616    | VPS9D1-AS1 | FOXA2  | PDX1     | 6     | 1325   | WT1-AS.1     | E2F1   | CDC25A  | 6     |
| 617    | VPS9D1-AS1 | FOSL1  | MMP1     | 3     | 1326   | WT1-AS.1     | USF1   | CYP19A1 | 4     |
| 618    | VPS9D1-AS1 | IRF9   | CCL19    | 6     | 1327   | WT1-AS.1     | STAT1  | TYMP    | 3     |
| 619    | VPS9D1-AS1 | E2F1   | TERT     | 3     | 1328   | WT1-AS.1     | POU2F1 | GNRHR   | 4     |
| 620    | VPS9D1-AS1 | E2F1   | NUSAP1   | 6     | 1329   | WT1-AS.1     | JUN    | HMMR    | 1     |
| 621    | WT1-AS     | RELB   | B2M      | 6     | 1330   | WT1-AS.1     | IRF1   | IL10    | 6     |
| 622    | WT1-AS     | CDX2   | CA1      | 4     | 1331   | WT1-AS.1     | FOSL1  | PLAUR   | 6     |
| 623    | WT1-AS     | SPI1   | CD68     | 5     | 1332   | WT1-AS.1     | SPI1   | PTGIR   | 5     |
| 624    | WT1-AS     | E2F1   | CDC25A   | 6     | 1333   | WT1-AS.1     | CEBPB  | DDIT4   | 5     |
| 625    | WT1-AS     | USF1   | CYP19A1  | 4     | 1334   | WT1-AS.1     | PAX5   | AICDA   | 6     |
| 626    | WT1-AS     | STAT1  | TYMP     | 3     | 1335   | RP11-379B8.1 | STAT1  | IL2RA   | 6     |
| 627    | WT1-AS     | POU2F1 | GNRHR    | 4     | 1336   | RP11-379B8.1 | FOSL1  | IVL     | 4     |
| 628    | WT1-AS     | JUN    | HMMR     | 1     | 1337   | RP11-379B8.1 | E2F1   | POLE2   | 6     |
| 629    | WT1-AS     | IRF1   | IL10     | 6     | 1338   | RP11-379B8.1 | IRF1   | IFITM1  | 3     |
| 630    | WT1-AS     | FOSL1  | PLAUR    | 6     | 1339   | RP11-379B8.1 | E2F4   | AURKB   | 6     |
| 631    | WT1-AS     | SPI1   | PTGIR    | 5     | 1340   | RP11-379B8.1 | IRF1   | ISG15   | 6     |
| 632    | WT1-AS     | CEBPB  | DDIT4    | 5     | 1341   | ZNF295-AS1.1 | RELB   | B2M     | 6     |
| 633    | WT1-AS     | PAX5   | AICDA    | 6     | 1342   | ZNF295-AS1.1 | E2F1   | CDC25A  | 6     |
| 634    | ZEB1-AS1   | CDX2   | CA1      | 4     | 1343   | ZNF295-AS1.1 | POU2F1 | GNRHR   | 4     |
| 635    | ZEB1-AS1   | STAT6  | FCER2    | 4     | 1344   | ZNF295-AS1.1 | E2F1   | HELLS   | 6     |
| 636    | ZEB1-AS1   | IRF7   | IL12A    | 3     | 1345   | ZNF295-AS1.1 | CEBPB  | HP      | 3     |
| 637    | ZFPM2-AS1  | NFATC2 | FCER2    | 3     | 1346   | ZNF295-AS1.1 | STAT1  | IL2RA   | 6     |
| 638    | ZFPM2-AS1  | POU2F1 | GNRHR    | 4     | 1347   | ZNF295-AS1.1 | STAT1  | IDO1    | 6     |
| 639    | ZFPM2-AS1  | E2F1   | HELLS    | 6     | 1348   | ZNF295-AS1.1 | SPIB   | ITGAM   | 5     |
| 640    | ZFPM2-AS1  | IRF7   | IFNB1    | 6     | 1349   | ZNF295-AS1.1 | NKX2-5 | PLOD1   | 3     |
| 641    | ZFPM2-AS1  | STAT1  | IL12A    | 3     | 1350   | ZNF295-AS1.1 | IRF5   | ISG15   | 6     |
| 642    | ZNF295-AS1 | RELB   | B2M      | 6     | 1351   | ZNF295-AS1.1 | SPI1   | ISG15   | 3     |

Table SI. Continued.

| Number | lncRNA      | TF     | Gene     | Class | Number | lncRNA        | TF     | Gene     | Class |
|--------|-------------|--------|----------|-------|--------|---------------|--------|----------|-------|
| 643    | ZNF295-AS1  | E2F1   | CDC25A   | 6     | 1352   | ZNF295-AS1.1  | IRF1   | XAF1     | 6     |
| 644    | ZNF295-AS1  | POU2F1 | GNRHR    | 4     | 1353   | RASSF1-AS1.1  | STAT6  | FCER2    | 4     |
| 645    | ZNF295-AS1  | E2F1   | HELLS    | 6     | 1354   | RASSF1-AS1.1  | STAT1  | IL12A    | 5     |
| 646    | ZNF295-AS1  | CEBPB  | HP       | 3     | 1355   | RASSF1-AS1.1  | PAX5   | CIITA    | 5     |
| 647    | ZNF295-AS1  | STAT1  | IL2RA    | 6     | 1356   | RASSF1-AS1.1  | E2F4   | AURKB    | 6     |
| 648    | ZNF295-AS1  | STAT1  | IDO1     | 6     | 1357   | RASSF1-AS1.1  | CEBPB  | DDIT4    | 6     |
| 649    | ZNF295-AS1  | SPIB   | ITGAM    | 5     | 1358   | GATA6-AS1.1   | STAT6  | FCER2    | 4     |
| 650    | ZNF295-AS1  | NKX2-5 | PLOD1    | 3     | 1359   | GATA6-AS1.1   | IRF1   | ISG15    | 6     |
| 651    | ZNF295-AS1  | IRF5   | ISG15    | 6     | 1360   | CTC-276P9-4.1 | FUBP1  | BRCA1    | 6     |
| 652    | ZNF295-AS1  | SPI1   | ISG15    | 3     | 1361   | CTC-276P9-4.1 | E2F1   | CDC25A   | 6     |
| 653    | ZNF295-AS1  | IRF1   | XAF1     | 6     | 1362   | CTC-276P9-4.1 | POU2F1 | GNRHR    | 4     |
| 654    | MIR4435-2HG | FOSL1  | PLAU     | 4     | 1363   | CTC-276P9-4.1 | IRF1   | IL10     | 5     |
| 655    | PAX8-AS1    | STAT1  | IDO1     | 5     | 1364   | CTC-276P9-4.1 | IRF1   | IL12B    | 6     |
| 656    | PAX8-AS1    | IRF1   | IRF7     | 5     | 1365   | CTC-276P9-4.1 | JUN    | MSH2     | 1     |
| 657    | PAX8-AS1    | NFATC2 | TNFSF14  | 5     | 1366   | CTC-276P9-4.1 | FOXD1  | SERPINE1 | 3     |
| 658    | CDKN2B-AS1  | PAX5   | FCER2    | 6     | 1367   | CTC-276P9-4.1 | E2F1   | AURKB    | 6     |
| 659    | CDKN2B-AS1  | NKX2-5 | PLOD1    | 3     | 1368   | CTC-276P9-4.1 | E2F1   | NUSAP1   | 6     |
| 660    | CDKN2B-AS1  | IRF9   | CCL19    | 6     | 1369   | CTC-276P9-4.1 | CDX2   | UGT1A8   | 3     |
| 661    | CDKN2B-AS1  | IRF1   | IFITM1   | 6     | 1370   | LINC02154.1   | E2F1   | CDC25A   | 6     |
| 662    | CDKN2B-AS1  | PAX5   | AICDA    | 3     | 1371   | LINC02154.1   | PAX5   | FCER2    | 6     |
| 663    | AP001626.2  | NFATC2 | CD40LG   | 5     | 1372   | LINC02154.1   | E2F1   | HELLS    | 6     |
| 664    | AP001626.2  | SPI1   | CD68     | 5     | 1373   | LINC02154.1   | FOSL1  | MMP1     | 4     |
| 665    | AP001626.2  | IRF4   | CIITA    | 5     | 1374   | LINC02154.1   | E2F1   | POLE2    | 6     |
| 666    | AP001626.2  | E2F1   | AURKB    | 4     | 1375   | LINC02154.1   | E2F1   | NUSAP1   | 6     |
| 667    | AP001626.2  | SPI1   | GPR132   | 6     | 1376   | LINC02154.1   | PAX5   | AICDA    | 6     |
| 668    | CTC-276P9.4 | FUBP1  | BRCA1    | 6     | 1377   | LINC02154.1   | STAT1  | IL21     | 5     |
| 669    | CTC-276P9.4 | E2F1   | CDC25A   | 6     | 1378   | LINC00887.1   | STAT1  | CYBB     | 5     |
| 670    | CTC-276P9.4 | POU2F1 | GNRHR    | 4     | 1379   | LINC00887.1   | JUN    | HMMR     | 4     |
| 671    | CTC-276P9.4 | IRF1   | IL10     | 5     | 1380   | LINC00887.1   | IRF1   | CXCL10   | 5     |
| 672    | CTC-276P9.4 | IRF1   | IL12B    | 6     | 1381   | LINC00887.1   | FOSL1  | IVL      | 4     |
| 673    | CTC-276P9.4 | JUN    | MSH2     | 1     | 1382   | LINC00887.1   | CEBPB  | PI3      | 4     |
| 674    | CTC-276P9.4 | FOXD1  | SERPINE1 | 3     | 1383   | HOXA11-AS.2   | NFATC2 | FCER2    | 6     |
| 675    | CTC-276P9.4 | E2F1   | AURKB    | 6     | 1384   | HOXA11-AS.2   | PAX5   | FCER2    | 6     |
| 676    | CTC-276P9.4 | E2F1   | NUSAP1   | 6     | 1385   | HOXA11-AS.2   | CEBPB  | HP       | 4     |
| 677    | CTC-276P9.4 | CDX2   | UGT1A8   | 3     | 1386   | LINC01315.1   | NFATC2 | CTLA4    | 5     |
| 678    | HAGLROS     | STAT1  | CD86     | 6     | 1387   | LINC01315.1   | POU2F2 | HLA-DRA  | 5     |
| 679    | HAGLROS     | STAT1  | TYMP     | 6     | 1388   | LINC01315.1   | PAX5   | CIITA    | 5     |
| 680    | HAGLROS     | STAT1  | FCGR1A   | 6     | 1389   | LINC01315.1   | NFATC2 | TNFSF14  | 5     |
| 681    | HAGLROS     | IKZF1  | GZMB     | 6     | 1390   | FAM3D-AS1.1   | STAT1  | CD86     | 5     |
| 682    | HAGLROS     | IRF1   | IFNB1    | 3     | 1391   | FAM3D-AS1.1   | POU2F1 | GNRHR    | 3     |
| 683    | HAGLROS     | IRF1   | IL10     | 6     | 1392   | FAM3D-AS1.1   | FOSL1  | IVL      | 3     |
| 684    | HAGLROS     | IRF1   | IL12A    | 3     | 1393   | FAM3D-AS1.1   | CEBPB  | MEFV     | 3     |
| 685    | HAGLROS     | IRF1   | IRF7     | 6     | 1394   | FAM3D-AS1.1   | IRF5   | ISG15    | 6     |
| 686    | HAGLROS     | STAT1  | PSMB9    | 6     | 1395   | LPP-AS2.1     | FUBP1  | BRCA1    | 5     |
| 687    | HAGLROS     | IRF1   | IFITM1   | 3     | 1396   | LPP-AS2.1     | CDX2   | CA1      | 4     |
| 688    | HAGLROS     | CEBPB  | DDIT4    | 6     | 1397   | LPP-AS2.1     | SPI1   | CD68     | 5     |
| 689    | HAGLROS     | STAT1  | IL21     | 6     | 1398   | LPP-AS2.1     | USF1   | CYP19A1  | 5     |
| 690    | LINC01234   | CDX2   | CA1      | 4     | 1399   | LPP-AS2.1     | IRF1   | IL12B    | 3     |
| 691    | LINC01234   | NFATC2 | FCER2    | 3     | 1400   | PACERR.1      | USF1   | CYP19A1  | 5     |
| 692    | LINC01234   | E2F1   | HELLS    | 3     | 1401   | LINC01705     | RELB   | B2M      | 6     |
| 693    | LINC01234   | JUN    | HMMR     | 1     | 1402   | LINC01705     | STAT1  | CD86     | 6     |
| 694    | LINC01234   | SPI1   | ISG15    | 4     | 1403   | LINC01705     | NFATC2 | CTLA4    | 6     |
| 695    | LINC01234   | E2F1   | NUSAP1   | 6     | 1404   | LINC01705     | STAT1  | TYMP     | 6     |
| 696    | FOXP4-AS1   | E2F1   | HELLS    | 6     | 1405   | LINC01705     | NFATC2 | FCER2    | 3     |
| 697    | FOXP4-AS1   | RUNX2  | IBSP     | 3     | 1406   | LINC01705     | PAX5   | FCER2    | 6     |
| 698    | FOXP4-AS1   | SPIB   | ITGAM    | 5     | 1407   | LINC01705     | STAT1  | FCGR1A   | 6     |
| 699    | FOXP4-AS1   | FOSL1  | MMP1     | 3     | 1408   | LINC01705     | IRF1   | IL10     | 6     |
| 700    | FOXP4-AS1   | IRF7   | CCL5     | 6     | 1409   | LINC01705     | IRF1   | IL12A    | 3     |
| 701    | CYTOR       | STAT1  | CD86     | 6     | 1410   | LINC01705     | IRF7   | IL12A    | 3     |

Table SI. Continued.

| Number | lncRNA    | TF     | Gene    | Class | Number | lncRNA    | TF     | Gene    | Class |
|--------|-----------|--------|---------|-------|--------|-----------|--------|---------|-------|
| 702    | CYTOR     | STAT1  | TYMP    | 6     | 1411   | LINC01705 | STAT2  | IL12A   | 3     |
| 703    | CYTOR     | STAT1  | FCGR1A  | 6     | 1412   | LINC01705 | SPIB   | ITGAM   | 3     |
| 704    | LINC01139 | POU2F2 | HLA-DRA | 5     | 1413   | LINC01705 | STAT1  | PRF1    | 6     |
| 705    | LINC01139 | CEBPB  | HP      | 3     | 1414   | LINC01705 | SPI1   | PTGIR   | 5     |
| 706    | LINC01139 | IRF1   | IFNB1   | 3     | 1415   | LINC01705 | STAT1  | SOAT1   | 5     |
| 707    | LINC01139 | IRF7   | IFNB1   | 6     | 1416   | LINC01705 | NFATC2 | TNFSF14 | 6     |
| 708    | LINC01139 | SPI1   | ITGAM   | 6     | 1417   | LINC01705 | SPI1   | GPR132  | 6     |
| 709    | LINC01139 | VAV1   | ITGAM   | 6     |        |           |        |         |       |

lncRNA, long non-coding RNA; TF, transcription factor.
